# Supplementary material for: The Effects of Incorporating Non-linearity in LCA: Characterizing the Impact on Human Health
Source: Frontiers journal article supplement (doi:10.3389/frsus.2020.569385), 2020-10-07
Supplement: Table_1.XLSX [file Table_1.XLSX]

## Sheet: Cover page
Supporting Information Part 3 for
The effects of incorporating non-linearity in LCA: characterizing the impact on human health
Dingsheng Li
Mengya Tao
Jessica Vieira
Sangwon Suh*
Corresponding author email address: suh@bren.ucsb.edu
This Supporting Information contains two sheets with information of parameterization of the models used in this study

## Sheet: Environment
Parameter name	Value	Unit	Applied to cell in USEtox 2.1	Source	Note:	In column E, the first letter stands for the sheet in USEtox 2.1 and the second alphabet-numeric combination stands for the cell in that sheet
Region Name	Visalia	--	L B32			Abbreviations for the sheets' names are as follows:
Air Height	1000	m	F J160			L: Landscape & indoor data
Air Density	1.185	kg/m3	F J92			F: Fate
Dynamic Viscosity of Air	1.846e-05	kg/ms	No equivalent in USEtox			USEtox 2.1 can be downloaded at https://usetox.org/model/download/usetox2.1
Aerosols Density	2000	kg/m3	No equivalent in USEtox
Aerosols Concentration	2.78926e-08	kg/m3	No equivalent in USEtox	US EPA Air Data		Soil type in CLiCC and USEtox
Average Aerosols Particle Radius	2.5e-06	m	No equivalent in USEtox			CLiCC	USEtox
Wet Deposition Aerosols Scavenging Ratio	200000	--	F J249			Soil 1	Natural soil
Area Freshwater	9.59017e+07	m2	L F32			Soil 2	Urban soil
Depth Freshwater	0.1071	m	L N32	US EPA STORET		Soil 3	Agricultrual soil
Density of Freshwater	1000	kg/m3	F J93			Soil 4	Other soil
Dynamic Viscosity of Freshwater	0.001002	kg/ms	No equivalent in USEtox
Freshwater Suspended Sediment Density	1500	kg/m3	F J96			Source names/links
Freshwater Suspended Sediment Concentration	0.000833333	kg/m3	F J197	US EPA STORET		Blanks are assumed by authors
Average Suspended Sediment Particle Radius in Freshwater	1e-06	m	No equivalent in USEtox			Name	Link
Freshwater Suspended Sediment Organic Carbon Content	0.019	kg/kg	F J196	US EPA STORET		US EPA Air Data	https://aqs.epa.gov/aqsweb/airdata/download_files.html
Freshwater Sediment Depth	0.05	m	F J163			US EPA STORET	https://www.epa.gov/waterdata/water-quality-data-wqx
Density of Fresh Sediment Solid	2400	kg/m3	F J94			NLCD Land Cover	https://www.mrlc.gov/data
Freshwater Sediment Percent Solid	0.2	--	No equivalent in USEtox			STATSGO	http://www.nrcs.usda.gov/wps/portal/nrcs/detail/soils/survey/geo/?cid=nrcs142p2_053629
Freshwater Sediment organic carbon content	0.019	kg/kg	F J214	US EPA STORET		MN Stormwater Manual	https://stormwater.pca.state.mn.us/index.php?title=Soil_water_storage_properties
Burial Rate for Freshwater Sediment	4.19e-08	m3/m2hr	F J287			Gillette and Passi (1988)	Gillette, D. A.; Passi, R. Modeling dust emission caused by wind erosion. J. Geophys. Res. Atmospheres 1988, 93 (D11), 14233–14242
Resuspension Rate for Freshwater Sediment	3e-07	m3/m2hr	F J273			Wieringa (1992)	Wieringa, J. Updating the Davenport roughness classification. J. Wind Eng. Ind. Aerodyn. 1992, 41 (1–3), 357–368
Freshwater sediment advective flow ratio	5e-05	--	No equivalent in USEtox			Gillette et al. (1997)	Gillette, D. A.; Fryrear, D. W.; Xiao, J. B.; Stockton, P.; Ono, D.; Helm, P. J.; Gill, T. E.; Ley, T. Largescale variability of wind erosion mass flux rates at Owens Lake: 1. Vertical profiles of horizontal mass fluxes of wind-eroded particles with diameter greater than 50 μm. J. Geophys. Res. Atmospheres 1997, 102 (D22), 25977–25987
Area Marine Water	0	m2	L E32			Kelly et al. (2004)	Kelly, R.; Drake, N.; Barr, S. Spatial Modelling of the terrestrial environment; Wiley, 2004
Depth Marine Water	0	m	F J162
Density of Marine Water	0	kg/m3	No equivalent in USEtox
Dynamic Viscosity of Marine Water	0	kg/ms	No equivalent in USEtox
Coastal Area	0	m2	No equivalent in USEtox
Marine Suspended Sediment Density	0	kg/m3	No equivalent in USEtox
Marine Suspended Sediment Concentration	0	kg/m3	F J206
Average Suspended Sediment Particle Radius in Marine Water	0	m	No equivalent in USEtox
Marine Suspended Sediment Organic Carbon Content	0	--	F J205
Marine Sediment Depth	0	m	F J164
Density of Marine Sediment Solid	0	kg/m3	No equivalent in USEtox
Freshwater Marine Percent Solid	0	--	No equivalent in USEtox
Marine Sediment organic carbon content	0	--	F J217
Burial Rate for Marine Sediment	0	m3/m2hr	F J288
Resuspension Rate for Marine Sediment	0	m3/m2hr	F J275
Marine sediment advective flow ratio	0	--	No equivalent in USEtox
Soil Area 1	1.09286e+10	m2	L G32	NLCD Land Cover
Depth Surface Soil 1	0.350644	m	F J165	STATSGO
Density of Soil Solid 1	2400	kg/m3	No equivalent in USEtox
Soil Water Content 1	0.155	--	F J168	STATSGO
Soil Air Content 1	0.265	--	F J167	STATSGO
Organic Carbon Content Soil 1	0.0138259	kg/kg	F J222	STATSGO
Runoff Curve Number for Soil 1	70.7601	--	F J295	STATSGO
Field Capacity for Soil 1	0.32	m3/m3	No equivalent in USEtox	MN Stormwater Manual
Depth Deep Soil 1	1	m	No equivalent in USEtox
Density of Deep Soil Solid 1	2500	kg/m3	No equivalent in USEtox
Deep Soil organic carbon content 1	0.001	kg/kg	No equivalent in USEtox
Saltation Fitting parameter (dimensionless) 1	1	--	No equivalent in USEtox	STATSGO
Threshold wind Velocity to Cause Erosion Soil 1	1.383	m/s	No equivalent in USEtox	Gillette and Passi (1988)
Minimum threshold shear velocity 1	75	m/s	No equivalent in USEtox	STATSGO
Height of wind measurements 1	1.5	m	No equivalent in USEtox
Roughness of Soil 1	0.0024	m	No equivalent in USEtox	Wieringa (1992)
Kconstant for Soil 1	0.000119668	m-1	No equivalent in USEtox	Gillette et al. 1997 and Kelly et al. 2004
Hours per day of sufficient wind for wind erosion 1	0.416667	h/24h	No equivalent in USEtox	STATSGO
Consistency of wind thoughout the day 1	0.05	--	No equivalent in USEtox	STATSGO
Percent Land Uncovered and Available for Wind Erosion 1	0.05	--	No equivalent in USEtox	STATSGO
Percent Particles that remain suspended based on average soil size distribution 1	0.1	--	No equivalent in USEtox	STATSGO
Soil Erodibility Factor 1	0.311367	--	No equivalent in USEtox	STATSGO
Slope of Soil 1	18.6178	%	No equivalent in USEtox	STATSGO
Crop management Factor for Soil 1	0.0600265	--	No equivalent in USEtox	STATSGO
Support Practice Factor for Soil 1	0.5	--	No equivalent in USEtox	STATSGO
Soil Area 2	1.46534e+09	m2	L AI32	NLCD Land Cover
Depth Surface Soil 2	0.317736	m	No equivalent in USEtox	STATSGO
Density of Soil Solid 2	2400	kg/m3	No equivalent in USEtox
Soil Water Content 2	0.155	--	No equivalent in USEtox	STATSGO
Soil Air Content 2	0.265	--	No equivalent in USEtox	STATSGO
Organic Carbon Content Soil 2	0.00939513	kg/kg	No equivalent in USEtox	STATSGO
Runoff Curve Number for Soil 2	77.4542	--	No equivalent in USEtox	STATSGO
Field Capacity for Soil 2	0.14	m3/m3	No equivalent in USEtox	MN Stormwater Manual
Depth Deep Soil 2	1	m	No equivalent in USEtox
Density of Deep Soil Solid 2	2500	kg/m3	No equivalent in USEtox
Deep Soil organic carbon content 2	0.001	kg/kg	No equivalent in USEtox
Saltation fitting parameter (dimensionless) 2	1	--	No equivalent in USEtox	STATSGO
Threshold wind Velocity to Cause Erosion Soil 2	1.416	m/s	No equivalent in USEtox	Gillette and Passi (1988)
Minimum threshold shear velocity 2	75	m/s	No equivalent in USEtox	STATSGO
Height of wind measurements 2	1.5	m	No equivalent in USEtox
Roughness of Soil 2	0.41081	m	No equivalent in USEtox	Wieringa (1992)
Kconstant for Soil 2	0.000199526	m-1	No equivalent in USEtox	Gillette et al. 1997 and Kelly et al. 2004
Hours per day of sufficient wind for wind erosion 2	0.416667	h/24h	No equivalent in USEtox	STATSGO
Consistency of wind thoughout the day 2	0.05	--	No equivalent in USEtox	STATSGO
Percent Land Uncovered and Available for Wind Erosion 2	0.05	--	No equivalent in USEtox	STATSGO
Percent Particles that remain suspended based on average soil size distribution 2	0.1	--	No equivalent in USEtox	STATSGO
Soil Erodibility Factor 2	0.328044	--	No equivalent in USEtox	STATSGO
Slope of Soil 2	3.27349	%	No equivalent in USEtox	STATSGO
Crop management Factor for Soil 2	0.15	--	No equivalent in USEtox	STATSGO
Support Practice Factor for Soil 2	0.3	--	No equivalent in USEtox	STATSGO
Soil Area 3	9.82274e+09	m2	L H32	NLCD Land Cover
Depth Surface Soil 3	0.293562	m	F J166	STATSGO
Density of Soil Solid 3	2400	kg/m3	No equivalent in USEtox
Soil Water Content 3	0.155	--	F J171	STATSGO
Soil Air Content 3	0.265	--	F J170	STATSGO
Organic Carbon Content Soil 3	0.00873194	kg/kg	F J227	STATSGO
Runoff Curve Number for Soil 3	83.0585	--	F J296	STATSGO
Field Capacity for Soil 3	0.32	m3/m3	No equivalent in USEtox	MN Stormwater Manual
Depth Deep Soil 3	1	m	No equivalent in USEtox
Density of Deep Soil Solid 3	2500	kg/m3	No equivalent in USEtox
Deep Soil organic carbon content 3	0.001	kg/kg	No equivalent in USEtox
Saltation fitting parameter (dimensionless) 3	1	--	No equivalent in USEtox	STATSGO
Threshold wind Velocity to Cause Erosion Soil 3	1.35	m/s	No equivalent in USEtox	Gillette and Passi (1988)
Minimum threshold shear velocity 3	55	m/s	No equivalent in USEtox	STATSGO
Height of wind measurements 3	1.5	m	No equivalent in USEtox
Roughness of Soil 3	0.0626108	m	No equivalent in USEtox	Wieringa (1992)
Kconstant for Soil 3	3.98107e-05	m-1	No equivalent in USEtox	Gillette et al. 1997 and Kelly et al. 2004
Hours per day of sufficient wind for wind erosion 3	0.416667	h/24h	No equivalent in USEtox	STATSGO
Consistency of wind thoughout the day 3	0.05	--	No equivalent in USEtox	STATSGO
Percent Land Uncovered and Available for Wind Erosion 3	0.1	--	No equivalent in USEtox	STATSGO
Percent Particles that remain suspended based on average soil size distribution 3	0.1	--	No equivalent in USEtox	STATSGO
Soil Erodibility Factor 3	0.348203	--	No equivalent in USEtox	STATSGO
Slope of Soil 3	1.09385	%	No equivalent in USEtox	STATSGO
Crop management Factor for Soil 3	0.227295	--	No equivalent in USEtox	STATSGO
Support Practice Factor for Soil 3	0.6	--	No equivalent in USEtox	STATSGO
Soil Area 4	1.27772e+07	m2	L I32	NLCD Land Cover
Depth Surface Soil 4	1.73962	m	No equivalent in USEtox	STATSGO
Density of Soil Solid 4	2400	kg/m3	No equivalent in USEtox
Soil Water Content 4	0.155	--	No equivalent in USEtox	STATSGO
Soil Air Content 4	0.265	--	No equivalent in USEtox	STATSGO
Organic Carbon Content Soil 4	0.010151	kg/kg	No equivalent in USEtox	STATSGO
Runoff Curve Number for Soil 4	83.0585	--	No equivalent in USEtox	STATSGO
Field Capacity for Soil 4	0.32	m3/m3	No equivalent in USEtox	MN Stormwater Manual
Depth Deep Soil 4	1	m	No equivalent in USEtox
Density of Deep Soil Solid 4	2500	kg/m3	No equivalent in USEtox
Deep Soil organic carbon content 4	0.001	kg/kg	No equivalent in USEtox
Saltation fitting parameter (dimensionless) 4	1	--	No equivalent in USEtox	STATSGO
Threshold wind Velocity to Cause Erosion Soil 4	1.35	m/s	No equivalent in USEtox	Gillette and Passi (1988)
Minimum threshold shear velocity 4	55	m/s	No equivalent in USEtox	STATSGO
Height of wind measurements 4	1.5	m	No equivalent in USEtox
Roughness of Soil 4	0.0626108	m	No equivalent in USEtox	Wieringa (1992)
Kconstant for Soil 4	3.98107e-05	m-1	No equivalent in USEtox	Gillette et al. 1997 and Kelly et al. 2004
Hours per day of sufficient wind for wind erosion 4	0.416667	h/24h	No equivalent in USEtox	STATSGO
Consistency of wind thoughout the day 4	0.05	--	No equivalent in USEtox	STATSGO
Percent Land Uncovered and Available for Wind Erosion 4	0.1	--	No equivalent in USEtox	STATSGO
Percent Particles that remain suspended based on average soil size distribution 4	0.1	--	No equivalent in USEtox	STATSGO
Soil Erodibility Factor 4	0.323321	--	No equivalent in USEtox	STATSGO
Slope of Soil 4	0.9977	%	No equivalent in USEtox	STATSGO
Crop management Factor for Soil 4	0.227295	--	No equivalent in USEtox	STATSGO
Support Practice Factor for Soil 4	0.6	--	No equivalent in USEtox	STATSGO

## Sheet: Climate
Month	Day	Year	Precipitation (mm/day)	Windspeed (m/second)	Water flow (m^3/s)	Temperature ('C)	Evaporation (mm)	Average values
1	1	2005	5.08	2.0113	3.14316	9.5	0	Precipitation (mm/day)	Windspeed (m/second)	Water flow (m^3/s)	Temperature ('C)	Evaporation (mm)
1	2	2005	0	0.9833	3.14316	9.5	0	0.461714	1.76426	12.2517	17.1512	50.533
1	3	2005	4.064	1.6537	3.14316	10	0	Applied to cell in USEtox 2.1
1	4	2005	16.002	1.028	3.25643	6.5	0
1	5	2005	0	0.6704	3.28475	8.5	0	L M32	L K32	No equivalent in USEtox	L J32	No equivalent in USEtox
1	6	2005	0	0.7598	3.39802	7.5	0
1	7	2005	0.508	2.7711	3.3697	10	0
1	8	2005	4.318	3.0839	3.17148	11.5	0	Sources
1	9	2005	15.24	2.1006	3.34138	14	0	Precipitation:	NNDC Climate data online, https://www7.ncdc.noaa.gov/CDO/cdoselect.cmd?datasetabbv=GSOD&countryabbv=&georegionabbv
1	10	2005	8.128	1.6537	3.08653	13.5	0	Wind speed:	NNDC Climate data online, https://www7.ncdc.noaa.gov/CDO/cdoselect.cmd?datasetabbv=GSOD&countryabbv=&georegionabbv
1	11	2005	0	2.0559	2.77505	11	0	Water flow:	USGS surface-water data for the nation (daily data), http://waterdata.usgs.gov/nwis/sw
1	12	2005	2.032	1.3408	2.86	7.5	0	Temperature:	NNDC Climate data online, https://www7.ncdc.noaa.gov/CDO/cdoselect.cmd?datasetabbv=GSOD&countryabbv=&georegionabbv
1	13	2005	0	0.8492	4.16257	4.5	0	Evaporation:	TerraClimate, http://www.climatologylab.org/terraclimate.html
1	14	2005	0	0.6257	5.26692	5.5	0
1	15	2005	0	0.5363	4.559	6.5	0
1	16	2005	0	0.8939	4.61564	6	0
1	17	2005	0	1.1621	3.68118	6	0
1	18	2005	0	1.2068	2.74673	7	0
1	19	2005	0	0.7598	2.71841	7	0
1	20	2005	0	0.4469	2.74673	7	0
1	21	2005	0	0.7151	2.83168	7	0
1	22	2005	0	0.8492	2.91663	7	0
1	23	2005	0	0.9386	2.91663	7	0
1	24	2005	0	0.6257	3.00158	8.5	0
1	25	2005	0	0.6257	3.00158	13	0
1	26	2005	0	0.8939	3.00158	14.5	0
1	27	2005	0.254	1.6984	2.97326	10	0
1	28	2005	0.508	1.8325	2.6901	11.5	0
1	29	2005	7.62	1.6984	2.71841	8	0
1	30	2005	0	1.0727	2.77505	7.5	0
1	31	2005	0	0.6257	2.66178	8	0
2	1	2005	0	1.1174	2.43524	8.5	0
2	2	2005	0	0.7598	3.76613	9.5	0
2	3	2005	0	1.0727	4.50237	10	0
2	4	2005	0	1.1174	4.53069	10.5	0
2	5	2005	0	0.7151	4.64396	11.5	0
2	6	2005	0	0.9833	4.78554	11	0
2	7	2005	0	1.2068	4.98376	10	0
2	8	2005	0	0.9386	5.43683	9.5	0
2	9	2005	0	1.2068	7.05088	10.5	0
2	10	2005	0	0.8045	8.80652	9.5	0
2	11	2005	0	0.4469	9.7693	11.5	0
2	12	2005	0	1.5196	9.71266	14	0
2	13	2005	0	1.5196	9.51444	14	0
2	14	2005	0.07	1.5196	9.96751	14	0
2	15	2005	0.245	1.5196	10.1657	14	0
2	16	2005	0	1.5196	9.65603	14	0
2	17	2005	0	1.6984	7.5889	12	0
2	18	2005	3.302	2.1006	6.25801	13.5	0
2	19	2005	0	2.3241	5.83326	13.5	0
2	20	2005	7.62	2.3241	5.35188	14	0
2	21	2005	2.032	2.3241	5.01207	15	0
2	22	2005	0	2.5029	5.01207	13	0
2	23	2005	1.778	1.3855	6.2297	12.5	0
2	24	2005	0	1.0727	7.53227	13	0
2	25	2005	0	2.1453	8.69326	12.5	0
2	26	2005	0	1.4302	9.11801	12	0
2	27	2005	0	1.028	8.29682	12.5	0
2	28	2005	0	1.3855	5.80494	14.5	0
3	1	2005	0	0.8045	3.62455	11.5	33.77
3	2	2005	0.762	1.4302	3.34138	12.5	33.77
3	3	2005	0	0.9833	3.34138	12.5	33.77
3	4	2005	19.558	2.7711	3.48297	15	33.77
3	5	2005	0	4.0225	3.48297	16	33.77
3	6	2005	37.787	1.3408	3.45465	20	33.77
3	7	2005	0	1.3408	3.42633	20	33.77
3	8	2005	10.433	1.3408	3.14316	20	33.77
3	9	2005	0	1.3408	2.74673	20	33.77
3	10	2005	0	1.3408	2.80336	20	33.77
3	11	2005	0	1.3408	2.83168	20	33.77
3	12	2005	0	1.5643	3.00158	18	33.77
3	13	2005	0	2.0113	3.17148	19	33.77
3	14	2005	0.254	1.5643	3.79445	15.5	33.77
3	15	2005	0	1.5196	4.33247	14	33.77
3	16	2005	0	1.2514	4.33247	14	33.77
3	17	2005	25.146	1.2514	4.02099	13.5	33.77
3	18	2005	0	1.7878	4.13425	14.5	33.77
3	19	2005	0.508	2.0559	4.67227	14	33.77
3	20	2005	10.922	2.5923	5.12534	13.5	33.77
3	21	2005	1.524	1.9219	5.63504	13	33.77
3	22	2005	0	2.7711	5.32356	15	33.77
3	23	2005	7.366	2.7711	4.47405	13.5	33.77
3	24	2005	0	2.0113	3.39802	12.5	33.77
3	25	2005	0	2.7264	2.60515	11	33.77
3	26	2005	0	1.5643	2.63346	11.5	33.77
3	27	2005	0	0.9833	2.63346	14	33.77
3	28	2005	0	3.4415	2.57683	15.5	33.77
3	29	2005	3.048	2.4135	2.63346	11.5	33.77
3	30	2005	0	2.3688	2.77505	11.5	33.77
3	31	2005	0	1.4749	4.2192	14	33.77
4	1	2005	0	1.4749	4.30415	16	35.3067
4	2	2005	0	0.9386	4.3891	16	35.3067
4	3	2005	0	1.9219	4.47405	16	35.3067
4	4	2005	0	2.7711	4.559	13	35.3067
4	5	2005	0	1.6537	4.70059	13.5	35.3067
4	6	2005	0	1.1621	4.64396	18	35.3067
4	7	2005	0	3.2627	5.09702	19	35.3067
4	8	2005	0.508	2.9498	5.04039	9.5	35.3067
4	9	2005	0	2.0113	4.3891	10	35.3067
4	10	2005	0	1.9219	4.19089	14	35.3067
4	11	2005	0	0.581	3.93604	14	35.3067
4	12	2005	0	4.2013	3.7095	17	35.3067
4	13	2005	0	4.2013	3.76613	17	35.3067
4	14	2005	0	2.637	4.78554	11	35.3067
4	15	2005	0	1.5643	5.60673	14	35.3067
4	16	2005	0	1.4302	6.62613	17	35.3067
4	17	2005	0	1.3855	7.70217	18.5	35.3067
4	18	2005	0	3.5309	6.76772	16.5	35.3067
4	19	2005	0	2.3688	6.7394	14.5	35.3067
4	20	2005	0	1.6984	7.27742	14.5	35.3067
4	21	2005	0	1.4749	7.2491	16.5	35.3067
4	22	2005	0	0.9833	7.33405	17	35.3067
4	23	2005	0	1.8325	8.01365	14.5	35.3067
4	24	2005	1.524	2.9498	10.0525	17	35.3067
4	25	2005	0	2.4582	5.63504	15	35.3067
4	26	2005	0	1.2068	4.10594	16	35.3067
4	27	2005	0	2.0113	3.59623	16.5	35.3067
4	28	2005	1.778	1.3855	3.76613	14.5	35.3067
4	29	2005	0	1.1174	4.24752	14	35.3067
4	30	2005	0	1.3408	6.51286	15.5	35.3067
5	1	2005	0	1.609	7.9287	16.5	45.69
5	2	2005	0	2.5923	8.26851	19	45.69
5	3	2005	0	2.3241	4.72891	18.5	45.69
5	4	2005	0	2.1006	4.559	19.5	45.69
5	5	2005	0	3.1286	7.33405	20	45.69
5	6	2005	0	1.9219	15.1495	17	45.69
5	7	2005	0	2.1453	17.613	16	45.69
5	8	2005	0	1.2961	15.7158	17.5	45.69
5	9	2005	0	3.218	15.8574	18.5	45.69
5	10	2005	0	4.246	14.1867	13.5	45.69
5	11	2005	0	3.4862	10.2507	16.5	45.69
5	12	2005	0	1.609	8.29682	18	45.69
5	13	2005	0	1.2068	6.25801	20.5	45.69
5	14	2005	0	1.9666	5.21029	22.5	45.69
5	15	2005	0	2.5476	5.18197	23.5	45.69
5	16	2005	0	4.9611	5.29524	19.5	45.69
5	17	2005	0	3.218	5.57841	16.5	45.69
5	18	2005	0	1.2514	6.2297	21	45.69
5	19	2005	0	1.4749	6.65445	22.5	45.69
5	20	2005	0	3.6649	7.50395	22.5	45.69
5	21	2005	0	2.19	12.6293	20	45.69
5	22	2005	0	1.8325	25.5134	22	45.69
5	23	2005	0	2.2794	27.9204	23	45.69
5	24	2005	0	2.1453	34.5465	23	45.69
5	25	2005	0	0.9833	36.2455	25.5	45.69
5	26	2005	0	1.6984	33.1307	25.5	45.69
5	27	2005	0	2.3241	34.2633	25.5	45.69
5	28	2005	0	2.7711	35.9623	24.5	45.69
5	29	2005	0	3.7096	40.7762	21	45.69
5	30	2005	0	2.3241	53.5188	19.5	45.69
5	31	2005	0	1.2961	58.8989	23	45.69
6	1	2005	0	3.0839	59.7484	24.5	102.453
6	2	2005	0	3.0392	53.5188	22	102.453
6	3	2005	0	2.7711	45.59	21.5	102.453
6	4	2005	0	1.7878	27.1275	22.5	102.453
6	5	2005	0	3.3074	11.0436	22	102.453
6	6	2005	0	4.5141	10.1091	17.5	102.453
6	7	2005	0	3.7096	9.85425	17	102.453
6	8	2005	0	3.1733	10.4489	18	102.453
6	9	2005	0	3.1286	10.8453	21	102.453
6	10	2005	0	3.218	11.3834	21.5	102.453
6	11	2005	0	3.2627	14.3	22	102.453
6	12	2005	0	3.3968	16.5087	23	102.453
6	13	2005	0	2.0559	17.8113	24.5	102.453
6	14	2005	0	1.2514	17.9812	26.5	102.453
6	15	2005	0	2.5029	18.236	25	102.453
6	16	2005	0	2.5029	18.2077	23.5	102.453
6	17	2005	0	3.2627	17.7263	22	102.453
6	18	2005	0	2.5476	15.8857	18	102.453
6	19	2005	0	2.3688	14.923	20	102.453
6	20	2005	0	2.0113	14.4133	21.5	102.453
6	21	2005	0	2.0113	13.9885	22.5	102.453
6	22	2005	0	2.7711	14.1584	22	102.453
6	23	2005	0	2.1453	15.4893	24	102.453
6	24	2005	0	1.8325	16.3105	23.5	102.453
6	25	2005	0	2.2794	15.0362	23	102.453
6	26	2005	0	2.0113	13.9885	22.5	102.453
6	27	2005	0	2.3241	12.601	23	102.453
6	28	2005	0	2.8158	11.978	22.5	102.453
6	29	2005	0	2.1006	12.7426	24	102.453
6	30	2005	0	1.6537	13.677	27	102.453
7	1	2005	0	2.0113	15.0079	28.5	145.4
7	2	2005	0	2.19	15.4043	29	145.4
7	3	2005	0	2.5476	15.914	27	145.4
7	4	2005	0	2.0113	16.3954	26	145.4
7	5	2005	0	1.9219	16.7635	27.5	145.4
7	6	2005	0	2.4582	16.6786	27	145.4
7	7	2005	0	2.637	14.4416	27	145.4
7	8	2005	0	2.8604	12.9125	26.5	145.4
7	9	2005	0	2.9945	12.7992	25.5	145.4
7	10	2005	0	2.9945	13.3372	25	145.4
7	11	2005	0	2.4135	13.139	26.5	145.4
7	12	2005	0	1.3855	12.6293	29	145.4
7	13	2005	0	2.3241	14.0451	30	145.4
7	14	2005	0	1.4749	16.9618	30.5	145.4
7	15	2005	0	1.8325	18.774	31	145.4
7	16	2005	0	2.4135	18.859	32	145.4
7	17	2005	0	2.2347	18.5758	30.5	145.4
7	18	2005	0	1.2514	18.7457	30.5	145.4
7	19	2005	0	1.9666	18.8307	29.5	145.4
7	20	2005	0	2.19	18.4909	29.5	145.4
7	21	2005	0	2.0559	18.236	32	145.4
7	22	2005	0	2.7711	17.698	29.5	145.4
7	23	2005	0	2.1006	16.6503	28	145.4
7	24	2005	0	1.609	15.999	29.5	145.4
7	25	2005	0	2.4582	15.8291	29.5	145.4
7	26	2005	0	2.0559	16.2255	27.5	145.4
7	27	2005	0	1.6984	16.4237	28.5	145.4
7	28	2005	0	2.0559	14.9513	29.5	145.4
7	29	2005	0	2.4135	13.9035	29.5	145.4
7	30	2005	0	2.3241	13.8752	29	145.4
7	31	2005	0	2.19	13.7336	29.5	145.4
8	1	2005	0	2.19	13.7053	29	125.563
8	2	2005	0	2.5923	13.5921	29.5	125.563
8	3	2005	0	2.5029	14.3566	27.5	125.563
8	4	2005	0	2.1006	15.6592	28	125.563
8	5	2005	0	1.6537	15.1495	28.5	125.563
8	6	2005	0	1.7431	14.4133	30	125.563
8	7	2005	0	1.6537	14.3849	29.5	125.563
8	8	2005	0	1.5643	15.2344	29	125.563
8	9	2005	0	1.6984	16.2255	28	125.563
8	10	2005	0	1.6984	16.2538	28	125.563
8	11	2005	0	1.8772	16.7069	26	125.563
8	12	2005	0	1.4302	17.2166	27	125.563
8	13	2005	0	1.6537	16.7352	27.5	125.563
8	14	2005	0	2.0113	15.7158	25	125.563
8	15	2005	0	1.7878	13.5354	26.5	125.563
8	16	2005	0	2.2794	11.7515	27.5	125.563
8	17	2005	0	2.2794	11.5816	27.5	125.563
8	18	2005	0	1.9666	12.1479	26.5	125.563
8	19	2005	0	2.2347	12.9691	25	125.563
8	20	2005	0	1.8772	13.2523	25	125.563
8	21	2005	0	1.7878	12.9408	25.5	125.563
8	22	2005	0	2.3241	12.3461	25.5	125.563
8	23	2005	0	1.5196	11.4117	27.5	125.563
8	24	2005	0	0.7598	10.3923	27	125.563
8	25	2005	0	1.6984	10.279	26.5	125.563
8	26	2005	0	1.4302	10.3073	26.5	125.563
8	27	2005	0	1.5643	9.68435	27.5	125.563
8	28	2005	0	1.2961	8.26851	28.5	125.563
8	29	2005	0	0.9833	6.71108	25	125.563
8	30	2005	0	2.2794	5.46514	26	125.563
8	31	2005	0	1.4302	4.92712	26	125.563
9	1	2005	0	1.4302	4.98376	26	95.34
9	2	2005	0	1.2514	4.89881	25.5	95.34
9	3	2005	0	1.7431	4.02099	25.5	95.34
9	4	2005	0	1.7431	3.39802	24.5	95.34
9	5	2005	0	2.1006	4.0493	23	95.34
9	6	2005	0	1.4302	5.26692	23	95.34
9	7	2005	0	1.4302	6.76772	27.5	95.34
9	8	2005	0	1.8325	8.12692	24	95.34
9	9	2005	0	1.8772	8.94811	22	95.34
9	10	2005	0	2.4582	9.17464	17.7899	95.34
9	11	2005	0	2.19	8.35346	21	95.34
9	12	2005	0	1.5196	7.98534	18.5	95.34
9	13	2005	0	1.5196	8.29682	18.5	95.34
9	14	2005	0	2.3688	9.03306	19	95.34
9	15	2005	0	1.2514	9.99583	20	95.34
9	16	2005	0	2.1006	11.2418	20.5	95.34
9	17	2005	0	2.5476	12.1479	20	95.34
9	18	2005	0	2.3241	12.3744	19	95.34
9	19	2005	0	1.1174	12.0346	21	95.34
9	20	2005	0	1.2961	11.5533	24.5	95.34
9	21	2005	0	1.9666	10.1657	22.5	95.34
9	22	2005	0	1.2068	8.55167	23.5	95.34
9	23	2005	0	1.3855	7.56059	24	95.34
9	24	2005	0	3.2627	7.50395	21.5	95.34
9	25	2005	0	0.9833	8.29682	18.5	95.34
9	26	2005	0	2.2347	9.03306	22.5	95.34
9	27	2005	0	1.5196	9.65603	19.5	95.34
9	28	2005	0	1.6537	10.3923	22	95.34
9	29	2005	0	0.9833	11.0436	23.5	95.34
9	30	2005	0	1.028	11.2984	25	95.34
10	1	2005	0	0.7151	11.7232	24.5	50.8067
10	2	2005	0	2.5476	11.978	22	50.8067
10	3	2005	0	4.0225	11.6948	17.5	50.8067
10	4	2005	0	2.637	10.4206	16	50.8067
10	5	2005	0	1.5643	9.34454	16.5	50.8067
10	6	2005	0	1.3855	8.55167	18.5	50.8067
10	7	2005	0	1.2068	7.81544	20	50.8067
10	8	2005	0	1.6537	7.44732	20	50.8067
10	9	2005	0	1.3855	7.22078	15.5	50.8067
10	10	2005	0	0.8492	7.22078	19.5	50.8067
10	11	2005	0	1.028	7.05088	20	50.8067
10	12	2005	0	1.4302	6.96593	19	50.8067
10	13	2005	0	1.2514	6.99425	21	50.8067
10	14	2005	0	1.028	6.59781	22	50.8067
10	15	2005	0	2.7264	6.17306	22.5	50.8067
10	16	2005	0	1.8325	6.03148	16	50.8067
10	17	2005	0	1.2961	5.97484	17.5	50.8067
10	18	2005	0	2.8604	6.00316	19	50.8067
10	19	2005	0	0.9833	5.91821	17	50.8067
10	20	2005	0	0.8045	5.80494	16.5	50.8067
10	21	2005	0	1.1174	5.83326	17	50.8067
10	22	2005	0	0.8492	5.71999	18.5	50.8067
10	23	2005	0	1.2514	5.29524	18.5	50.8067
10	24	2005	0	1.1621	4.84217	19.5	50.8067
10	25	2005	0	1.4749	4.27584	18	50.8067
10	26	2005	0	1.4302	4.30415	15.5	50.8067
10	27	2005	0	1.9666	4.3891	17.5	50.8067
10	28	2005	0	0.5363	4.3891	14	50.8067
10	29	2005	0	0.9833	4.3891	15.5	50.8067
10	30	2005	0	2.1453	4.53069	17	50.8067
10	31	2005	0	1.1174	5.43683	16.5	50.8067
11	1	2005	0	0.9833	6.2297	17.5	12.1533
11	2	2005	0	1.6537	6.0598	19	12.1533
11	3	2005	0	2.4582	5.97484	14	12.1533
11	4	2005	0	1.3855	6.00316	12.5	12.1533
11	5	2005	0	1.2961	6.03148	11	12.1533
11	6	2005	0	0.2235	6.0598	13.5	12.1533
11	7	2005	0	0.7598	6.0598	18	12.1533
11	8	2005	0	1.8772	6.03148	19	12.1533
11	9	2005	0.254	2.19	6.03148	14.5	12.1533
11	10	2005	0	1.609	5.83326	13	12.1533
11	11	2005	0	1.3408	5.49346	13.5	12.1533
11	12	2005	0.829	0.3129	5.15366	7.5	12.1533
11	13	2005	0.116	0.3129	5.32356	7.5	12.1533
11	14	2005	0	0.3129	5.83326	7.5	12.1533
11	15	2005	0	0.3129	6.11643	7.5	12.1533
11	16	2005	0	1.6537	6.20138	16.5	12.1533
11	17	2005	0	0.6704	6.96593	14	12.1533
11	18	2005	0	0.8045	7.53227	15	12.1533
11	19	2005	0	0.5363	7.53227	14	12.1533
11	20	2005	0	0.6704	7.70217	13.5	12.1533
11	21	2005	0	0.9833	7.9287	13.5	12.1533
11	22	2005	0	0.4023	8.18356	13	12.1533
11	23	2005	0	0.581	7.98534	14	12.1533
11	24	2005	0	0.8492	7.5889	12.5	12.1533
11	25	2005	0	1.0727	7.53227	15	12.1533
11	26	2005	0	3.7543	7.39068	13.5	12.1533
11	27	2005	0	2.4135	11.6948	7.5	12.1533
11	28	2005	0	1.1174	17.5281	7.5	12.1533
11	29	2005	0	1.2961	9.62771	13.5	12.1533
11	30	2005	0	1.6984	4.41742	12.5	12.1533
12	1	2005	0	1.2068	2.32198	12.5	0
12	2	2005	5.08	3.6649	0.79287	13.5	0
12	3	2005	0	0.4916	0.651286	7	0
12	4	2005	0	1.028	0.538019	5.5	0
12	5	2005	0	0.6704	0.481386	5.5	0
12	6	2005	0	0.8045	0.424752	7	0
12	7	2005	0	0.4469	0.339802	7.5	0
12	8	2005	0	1.2068	0.311485	10.5	0
12	9	2005	0	1.3408	0.26901	8.5	0
12	10	2005	0	0.9386	0.203881	8.5	0
12	11	2005	0	1.1621	0.164237	10	0
12	12	2005	0	0.4023	0.192554	10.5	0
12	13	2005	0	1.4749	0.201049	9.5	0
12	14	2005	0	0.3576	0.167069	7	0
12	15	2005	0	0.7598	0.147247	6.5	0
12	16	2005	0	0.5363	0.130257	6	0
12	17	2005	0	0.8939	0.0906138	6	0
12	18	2005	0	1.609	0.0594653	7.5	0
12	19	2005	0	1.0727	0.113267	14.5	0
12	20	2005	0	1.0727	0.110436	14.5	0
12	21	2005	0	1.5643	0.079287	14	0
12	22	2005	0	1.7878	0.0877821	16.5	0
12	23	2005	0	1.3855	0.0679603	16	0
12	24	2005	0	0.7598	0.0453069	13	0
12	25	2005	0	1.4749	0.0311485	11	0
12	26	2005	0	2.7264	0.0509702	15	0
12	27	2005	0	1.2068	0.0736237	13	0
12	28	2005	0	1.6537	0.0736237	12.5	0
12	29	2005	0	1.6537	0.0453069	11.5	0
12	30	2005	0	1.1621	0.0271841	8	0
12	31	2005	0	3.8884	0.0116099	13.5	0
1	1	2006	0	1.87757	0.0118931	8.27778	0.1
1	2	2006	0	3.12928	0.0736237	11	0.1
1	3	2006	0	3.08458	0.0396435	10.9444	0.1
1	4	2006	0	1.02819	0.0118931	9.77778	0.1
1	5	2006	0	0.804672	0	10.5	0.1
1	6	2006	0	1.1623	0.104772	9.88889	0.1
1	7	2006	0	1.29642	0.424752	9.5	0.1
1	8	2006	0	0.715264	0.339802	9.27778	0.1
1	9	2006	0	0.715264	0.311485	9.33333	0.1
1	10	2006	0	0.804672	0.62297	7	0.1
1	11	2006	0	1.01702	1.55742	9.23611	0.1
1	12	2006	0.508	1.0729	1.69901	8.79861	0.1
1	13	2006	0.508	1.08966	1.98218	8.09722	0.1
1	14	2006	0.508	1.05613	1.89723	7.41667	0.1
1	15	2006	0.508	0.994664	1.84059	7.23611	0.1
1	16	2006	0.508	1.10084	1.95386	6.83333	0.1
1	17	2006	0.508	1.08966	2.01049	6.29167	0.1
1	18	2006	0	1.60934	1.92554	8.61111	0.1
1	19	2006	4.064	1.47523	1.78396	6.27778	0.1
1	20	2006	0	0.938784	1.81228	4.88889	0.1
1	21	2006	0	0.89408	1.86891	4.44444	0.1
1	22	2006	0	0.804672	2.57683	8.05556	0.1
1	23	2006	0	1.56464	3.25643	6.05556	0.1
1	24	2006	0	0.625856	3.28475	5	0.1
1	25	2006	0	1.51994	3.22812	8.55556	0.1
1	26	2006	0	1.69875	3.17148	9.83333	0.1
1	27	2006	0	2.77165	3.22812	9.16667	0.1
1	28	2006	0	1.02819	3.14316	7.44444	0.1
1	29	2006	0	1.0729	3.0299	8.38889	0.1
1	30	2006	0	1.02819	3.31307	9.38889	0.1
1	31	2006	0	1.96698	4.87049	10.0556	0.1
2	1	2006	0	1.02819	7.0792	8	1.06333
2	2	2006	0	0.89408	9.00474	10.9444	1.06333
2	3	2006	0	0.849376	10.1374	11.5	1.06333
2	4	2006	0	0.89408	10.279	10.1111	1.06333
2	5	2006	0	1.43053	10.0241	10	1.06333
2	6	2006	0	0.983488	10.0241	10.1111	1.06333
2	7	2006	0	1.25171	9.96751	10	1.06333
2	8	2006	0	0.67056	9.7693	10.1667	1.06333
2	9	2006	0	0.89408	9.5994	10.8333	1.06333
2	10	2006	0	0.759968	11.1851	11.2778	1.06333
2	11	2006	0	0.89408	12.8275	12.1111	1.06333
2	12	2006	0	0.625856	12.9125	12.5	1.06333
2	13	2006	0	1.0729	12.9408	12.7222	1.06333
2	14	2006	0	1.74346	12.4877	13.3333	1.06333
2	15	2006	0	1.96698	12.1762	10.0556	1.06333
2	16	2006	0	1.43053	12.2045	5.38889	1.06333
2	17	2006	0	1.87757	11.1285	6	1.06333
2	18	2006	0	3.08458	9.91088	6.55556	1.06333
2	19	2006	1.27	1.96698	10.4206	7.27778	1.06333
2	20	2006	0	0.625856	10.7038	6	1.06333
2	21	2006	0	1.65405	10.8453	6.72222	1.06333
2	22	2006	0	1.38582	11.5249	7.16667	1.06333
2	23	2006	0	0.44704	10.4772	8.38889	1.06333
2	24	2006	0	1.1176	8.97643	10.2222	1.06333
2	25	2006	0	1.02819	7.67385	11.8889	1.06333
2	26	2006	0	1.25171	6.68276	13.9444	1.06333
2	27	2006	0	2.86106	4.44574	15.3889	1.06333
2	28	2006	0	3.71043	1.95386	15.4444	1.06333
3	1	2006	0	1.69875	1.50079	8.94444	20.8667
3	2	2006	0	2.03403	1.55742	12.8611	20.8667
3	3	2006	0	2.2203	2.03881	12.2037	20.8667
3	4	2006	0	2.2203	1.75564	11.5556	20.8667
3	5	2006	0	2.19795	1.47247	10.1852	20.8667
3	6	2006	0	2.04893	1.30257	8.55556	20.8667
3	7	2006	0	1.65405	1.27426	11.5556	20.8667
3	8	2006	0	2.14579	1.33089	7.94444	20.8667
3	9	2006	0	1.25171	2.06713	10.0556	20.8667
3	10	2006	0	2.72694	3.17148	7.16667	20.8667
3	11	2006	0	2.81635	3.31307	5.66667	20.8667
3	12	2006	0	2.77165	3.22812	4.83333	20.8667
3	13	2006	0	1.20701	3.1998	7.88889	20.8667
3	14	2006	0	2.1905	3.34138	8.27778	20.8667
3	15	2006	0	2.12141	3.45465	8.74411	20.8667
3	16	2006	0.554182	2.09635	3.5396	8.64141	20.8667
3	17	2006	0.554182	2.04013	3.05821	8.96465	20.8667
3	18	2006	2.17055	2.21894	2.35029	9.33333	20.8667
3	19	2006	2.17055	2.22707	2.32198	9.34848	20.8667
3	20	2006	2.17055	2.21488	2.6901	10.0808	20.8667
3	21	2006	2.17055	2.14579	2.63346	10.6667	20.8667
3	22	2006	2.17055	2.06858	2.63346	11.2929	20.8667
3	23	2006	2.17055	2.10922	2.5202	11.8939	20.8667
3	24	2006	2.17055	2.10294	2.63346	11.9363	20.8667
3	25	2006	0	2.32461	2.83168	14.0556	20.8667
3	26	2006	6.096	1.92227	2.83168	9.05556	20.8667
3	27	2006	0	1.43053	5.21029	12.1111	20.8667
3	28	2006	11.43	3.66573	11.3834	13.0556	20.8667
3	29	2006	6.35	2.10109	15.0645	10.5	20.8667
3	30	2006	0	1.34112	15.2911	10.2222	20.8667
3	31	2006	0	2.59283	15.461	15.2222	20.8667
4	1	2006	0	2.05638	16.9618	12.1111	40.9633
4	2	2006	0	1.92227	20.2748	11.7222	40.9633
4	3	2006	0	1.65405	26.3063	14.5	40.9633
4	4	2006	28.448	2.54813	31.4316	14.8889	40.9633
4	5	2006	0	3.12928	48.1386	10.1667	40.9633
4	6	2006	8.128	0.983488	66.2613	9.66667	40.9633
4	7	2006	0	1.20701	88.0652	12.3333	40.9633
4	8	2006	0	1.83286	94.2949	14.9444	40.9633
4	9	2006	0	1.78816	97.4098	13.1667	40.9633
4	10	2006	0.508	2.14579	109.869	13.5	40.9633
4	11	2006	1.016	1.56464	107.887	13.3333	40.9633
4	12	2006	1.016	1.0729	102.224	16.2222	40.9633
4	13	2006	0	1.20701	103.923	14.8333	40.9633
4	14	2006	0	1.65405	112.701	16.6667	40.9633
4	15	2006	4.064	2.54813	113.55	14.3889	40.9633
4	16	2006	0	3.03987	111.568	13.6111	40.9633
4	17	2006	0	3.53162	120.913	12.3333	40.9633
4	18	2006	0	2.10109	127.142	11.3889	40.9633
4	19	2006	0	1.65405	128.841	14.2778	40.9633
4	20	2006	0	1.29642	129.974	16.9444	40.9633
4	21	2006	0	1.25171	129.974	18.0556	40.9633
4	22	2006	0	2.63754	129.408	15.6111	40.9633
4	23	2006	0	2.2352	128.275	12.5	40.9633
4	24	2006	7.874	1.02819	127.709	13.8333	40.9633
4	25	2006	0	1.0729	124.594	14.7778	40.9633
4	26	2006	0	2.63754	122.895	14.5556	40.9633
4	27	2006	0	1.83286	118.081	15.1667	40.9633
4	28	2006	0	1.29642	114.4	19.5556	40.9633
4	29	2006	0	1.43053	112.701	20.9444	40.9633
4	30	2006	0	1.96698	111.568	21.2778	40.9633
5	1	2006	0	1.29642	109.303	22.4444	43.0667
5	2	2006	0	1.56464	101.94	21.9444	43.0667
5	3	2006	0	1.83286	100.808	21.3889	43.0667
5	4	2006	0	1.38582	105.622	17.3889	43.0667
5	5	2006	0	1.0729	103.639	18.2222	43.0667
5	6	2006	0	1.87757	101.091	19.5	43.0667
5	7	2006	0	2.50342	101.374	18.5556	43.0667
5	8	2006	0	1.51994	101.091	21.5556	43.0667
5	9	2006	0	2.2799	99.392	21.2778	43.0667
5	10	2006	0	1.60934	104.206	21.7778	43.0667
5	11	2006	0	1.51994	105.622	24.5	43.0667
5	12	2006	0	1.87757	105.338	25.2222	43.0667
5	13	2006	0	2.32461	105.055	24.2778	43.0667
5	14	2006	0	2.1905	104.772	22.4444	43.0667
5	15	2006	0	1.56464	104.489	26.0556	43.0667
5	16	2006	0	1.20701	104.206	25.8889	43.0667
5	17	2006	0	1.78816	103.923	27.3889	43.0667
5	18	2006	0	1.29642	103.639	28.6667	43.0667
5	19	2006	0	2.2352	103.356	26.4444	43.0667
5	20	2006	0	1.83286	103.073	21.4444	43.0667
5	21	2006	0	2.05638	107.038	20.5	43.0667
5	22	2006	0	2.68224	114.4	16.2778	43.0667
5	23	2006	0.254	1.60934	117.798	17.8889	43.0667
5	24	2006	0	2.41402	119.497	20.5	43.0667
5	25	2006	0	3.88925	120.063	20.2778	43.0667
5	26	2006	0	4.24688	118.647	19.0556	43.0667
5	27	2006	0	5.72211	115.816	16.8889	43.0667
5	28	2006	0	2.99517	116.382	16.2778	43.0667
5	29	2006	0	2.32461	116.665	18.5556	43.0667
5	30	2006	0	2.01168	116.099	20.0556	43.0667
5	31	2006	0	2.01168	114.117	22.7778	43.0667
6	1	2006	0	2.14579	108.737	24.2778	56.12
6	2	2006	0	2.59283	97.9761	24.5556	56.12
6	3	2006	0	3.26339	98.2593	25.5556	56.12
6	4	2006	0	2.54813	99.6751	26.4444	56.12
6	5	2006	0	2.63754	99.9583	25.3889	56.12
6	6	2006	0	2.81635	98.8256	25.0556	56.12
6	7	2006	0	2.99517	96.8435	25.9444	56.12
6	8	2006	0	2.36931	93.7286	23.2222	56.12
6	9	2006	0	2.63754	90.8969	23.8333	56.12
6	10	2006	0	2.32461	92.3128	23.2222	56.12
6	11	2006	0	1.78816	92.0296	22.7222	56.12
6	12	2006	0	1.92227	87.7821	21.6111	56.12
6	13	2006	0	2.77165	82.6851	20.6111	56.12
6	14	2006	0	3.26339	76.4554	19.5556	56.12
6	15	2006	0	3.44221	65.9781	22.0556	56.12
6	16	2006	0	1.96698	58.3326	24	56.12
6	17	2006	0	1.74346	54.9346	27.0556	56.12
6	18	2006	0	1.87757	48.9881	27.8889	56.12
6	19	2006	0	2.68224	36.2455	26.3333	56.12
6	20	2006	0	2.10109	33.9802	24.6111	56.12
6	21	2006	0	1.51994	33.9802	26.2778	56.12
6	22	2006	0	2.10109	48.9881	28.2222	56.12
6	23	2006	0	1.94462	52.6692	29.1389	56.12
6	24	2006	0	1.78816	57.4831	30.0556	56.12
6	25	2006	0	1.87757	58.8989	30.7778	56.12
6	26	2006	0	1.83286	58.3326	31.5	56.12
6	27	2006	0	2.14579	49.2712	30.7222	56.12
6	28	2006	0	1.69875	32.8475	29.0556	56.12
6	29	2006	0	2.41402	19.0289	28	56.12
6	30	2006	0	2.81635	27.9487	28.1667	56.12
7	1	2006	0	2.86106	13.7053	26.2778	131.053
7	2	2006	0	1.60934	14.8663	26.9444	131.053
7	3	2006	0	2.63754	16.4237	27.3333	131.053
7	4	2006	0	2.77165	16.622	27.6111	131.053
7	5	2006	0	3.03987	17.2166	26.2222	131.053
7	6	2006	0	3.21869	17.7546	24.8333	131.053
7	7	2006	0	2.32461	17.5564	24.3889	131.053
7	8	2006	0	1.47523	17.0184	26.5556	131.053
7	9	2006	0	2.01168	16.7069	28.6667	131.053
7	10	2006	0	2.2352	16.4804	29.6111	131.053
7	11	2006	0	2.41402	17.0184	27.6111	131.053
7	12	2006	0	2.77165	17.698	25.6111	131.053
7	13	2006	0	2.45872	17.3299	24.8889	131.053
7	14	2006	0	1.0729	16.537	26.7222	131.053
7	15	2006	0	2.10109	16.3954	28.0556	131.053
7	16	2006	0	2.01168	17.1317	28.5	131.053
7	17	2006	0	2.1905	16.3671	33.7778	131.053
7	18	2006	0	1.34112	14.7531	31.0556	131.053
7	19	2006	0	1.60934	14.5265	30	131.053
7	20	2006	0	2.1905	15.6026	30.2222	131.053
7	21	2006	0	1.65405	16.9618	32.4444	131.053
7	22	2006	0	1.65405	15.7158	32.3889	131.053
7	23	2006	0	1.83286	14.6398	34.6667	131.053
7	24	2006	0	1.43053	14.6398	32.8333	131.053
7	25	2006	0	1.96698	15.2628	33.2778	131.053
7	26	2006	0	2.05638	15.8857	32	131.053
7	27	2006	0	2.10109	15.9424	30.4444	131.053
7	28	2006	0	1.69875	15.6309	29.0556	131.053
7	29	2006	0	1.29642	15.2911	28.1667	131.053
7	30	2006	0	1.92227	15.0929	26.5556	131.053
7	31	2006	0	2.68224	16.1406	26.0556	131.053
8	1	2006	0	2.81635	15.0929	23.7778	128.617
8	2	2006	0	2.45872	13.8752	24.6111	128.617
8	3	2006	0	1.1176	14.1584	25.7778	128.617
8	4	2006	0	1.69875	14.7531	25.5	128.617
8	5	2006	0	1.56464	14.9796	24.1111	128.617
8	6	2006	0	2.36931	15.6309	23.6111	128.617
8	7	2006	0	1.60934	15.2628	23.4444	128.617
8	8	2006	0	2.41402	13.5354	22.1667	128.617
8	9	2006	0	1.65405	13.3938	24.5	128.617
8	10	2006	0	1.20701	13.3655	26.8889	128.617
8	11	2006	0	1.74346	12.8841	27.2778	128.617
8	12	2006	0	2.2799	12.9125	25.3333	128.617
8	13	2006	0	1.96698	13.7336	24.2222	128.617
8	14	2006	0	1.87757	12.1762	24.7222	128.617
8	15	2006	0	1.92227	10.6188	23.3333	128.617
8	16	2006	0	1.60934	11.7515	23.7778	128.617
8	17	2006	0	1.65405	14.1301	23.2778	128.617
8	18	2006	0.508	1.38582	14.8663	24.7778	128.617
8	19	2006	0	1.87757	14.9513	24.7222	128.617
8	20	2006	0	1.96698	14.1584	24.2778	128.617
8	21	2006	0	1.92227	13.1956	24.3889	128.617
8	22	2006	0	1.69875	10.8737	25.4444	128.617
8	23	2006	0	1.29642	9.40118	25.8889	128.617
8	24	2006	0	2.10109	9.28791	25.6667	128.617
8	25	2006	0	1.29642	9.25959	24.6667	128.617
8	26	2006	0	1.43053	8.77821	23.8333	128.617
8	27	2006	0	0.983488	8.43841	24.6111	128.617
8	28	2006	0	1.34112	8.21187	26.2222	128.617
8	29	2006	0	1.43053	8.21187	25.6667	128.617
8	30	2006	0	1.25171	8.24019	24.5556	128.617
8	31	2006	0	1.02819	8.21187	24.9444	128.617
9	1	2006	0	1.38582	8.18356	25.2222	47.57
9	2	2006	0	1.25171	8.18356	25.3889	47.57
9	3	2006	0	1.43053	8.43841	25.7222	47.57
9	4	2006	0	1.78816	9.03306	24.8889	47.57
9	5	2006	0	1.56464	8.18356	25.1667	47.57
9	6	2006	0	1.34112	6.88098	27.0556	47.57
9	7	2006	0	1.43053	6.79603	26.5556	47.57
9	8	2006	0	1.29642	6.93762	24.6667	47.57
9	9	2006	0	1.60934	7.2491	20.7222	47.57
9	10	2006	0	1.74346	7.56059	20.5	47.57
9	11	2006	0	1.1176	6.88098	22.4444	47.57
9	12	2006	0	1.29642	5.80494	24.6667	47.57
9	13	2006	0	1.20701	5.21029	25.8889	47.57
9	14	2006	0	1.69875	5.52178	25.8333	47.57
9	15	2006	0	2.72694	6.00316	18.7778	47.57
9	16	2006	0	2.68224	5.86158	16.8889	47.57
9	17	2006	0	1.29642	5.77663	17.6111	47.57
9	18	2006	0	1.38582	6.17306	20.3889	47.57
9	19	2006	0	1.96698	6.65445	22.0556	47.57
9	20	2006	0	1.56464	7.0792	20.3333	47.57
9	21	2006	0	1.69875	8.83484	19.8889	47.57
9	22	2006	0	1.78816	10.8737	20.2222	47.57
9	23	2006	0	1.25171	11.4966	19.2778	47.57
9	24	2006	0	1.25171	10.9869	20.6111	47.57
9	25	2006	0	1.60934	10.6188	20.9444	47.57
9	26	2006	0	1.1623	10.5622	21.0556	47.57
9	27	2006	0	1.1176	10.4489	21.4444	47.57
9	28	2006	0	0.715264	10.2224	21.6111	47.57
9	29	2006	0	0.536448	10.7038	21.2778	47.57
9	30	2006	0	1.02819	10.5055	21.0556	47.57
10	1	2006	0	2.10109	9.82593	17.6111	6.91333
10	2	2006	0	1.25171	10.0525	15.8889	6.91333
10	3	2006	0	0.44704	9.5994	17.2778	6.91333
10	4	2006	0	1.38582	8.66494	16.7778	6.91333
10	5	2006	0	1.56464	8.0986	16.2778	6.91333
10	6	2006	0	2.01168	7.13583	15	6.91333
10	7	2006	0	1.34112	6.5695	15.2778	6.91333
10	8	2006	0	1.38582	6.5695	16.6667	6.91333
10	9	2006	0	0.983488	6.71108	18.0556	6.91333
10	10	2006	0	1.74346	7.19247	18.5	6.91333
10	11	2006	0	2.05638	7.419	16.2222	6.91333
10	12	2006	0	1.83286	7.56059	16.6111	6.91333
10	13	2006	0	2.01168	7.78712	17.6111	6.91333
10	14	2006	1.27	1.74346	7.73049	15.3889	6.91333
10	15	2006	0	0.625856	7.70217	15.2222	6.91333
10	16	2006	0	0.849376	7.2491	15.5556	6.91333
10	17	2006	0	2.59283	7.05088	15.7222	6.91333
10	18	2006	0	1.38582	6.79603	14.8889	6.91333
10	19	2006	0	0.804672	6.45623	14.7222	6.91333
10	20	2006	0	0.89408	6.76772	15.7222	6.91333
10	21	2006	0	0.67056	7.13583	17.1667	6.91333
10	22	2006	0	0.983488	7.22078	18.2222	6.91333
10	23	2006	0	0.983488	6.88098	17.3889	6.91333
10	24	2006	0	0.759968	6.59781	17.7778	6.91333
10	25	2006	0	2.10109	6.62613	16.3333	6.91333
10	26	2006	0	1.47523	6.59781	13.7222	6.91333
10	27	2006	0	0.625856	6.5695	13.7778	6.91333
10	28	2006	0	0.983488	6.59781	14	6.91333
10	29	2006	0	0.67056	6.68276	14.5556	6.91333
10	30	2006	0	0.759968	6.79603	12.6667	6.91333
10	31	2006	0	0.938784	6.7394	11.6111	6.91333
11	1	2006	0	0.715264	6.71108	12.1111	23.1767
11	2	2006	0	1.02819	6.62613	14.6667	23.1767
11	3	2006	0	0.625856	6.31465	14.7222	23.1767
11	4	2006	0	1.60934	6.14475	15.0556	23.1767
11	5	2006	0	0.804672	6.17306	11.9444	23.1767
11	6	2006	0	0.536448	6.17306	13.9444	23.1767
11	7	2006	0	0.491744	6.45623	15.2222	23.1767
11	8	2006	0	0.625856	6.7394	15.7222	23.1767
11	9	2006	0	4.33629	6.42791	14.2778	23.1767
11	10	2006	0	1.43053	6.14475	10.2778	23.1767
11	11	2006	0	1.43053	6.14475	10.8889	23.1767
11	12	2006	0	2.32461	6.37128	12.0556	23.1767
11	13	2006	0	1.20701	6.85267	11.3889	23.1767
11	14	2006	0	1.74346	7.19247	15.6111	23.1767
11	15	2006	0	1.87757	6.9093	11.4444	23.1767
11	16	2006	0	0.67056	6.48455	11.5556	23.1767
11	17	2006	0	0.581152	6.31465	13.2778	23.1767
11	18	2006	0	0.625856	6.03148	13.3333	23.1767
11	19	2006	0	1.1623	5.40851	11.4444	23.1767
11	20	2006	0	0.89408	4.98376	12.1667	23.1767
11	21	2006	0	1.47523	4.98376	12.7778	23.1767
11	22	2006	0	0.44704	4.92712	11.2222	23.1767
11	23	2006	0	2.36931	7.73049	12.6667	23.1767
11	24	2006	0	2.01168	16.3671	9.16667	23.1767
11	25	2006	0	0.536448	9.03306	9.11111	23.1767
11	26	2006	0	1.1623	5.15366	7.5	23.1767
11	27	2006	0.508	1.38582	3.76613	10.8333	23.1767
11	28	2006	0	3.71043	2.15208	8.16667	23.1767
11	29	2006	0	1.60934	0.877821	3.77778	23.1767
11	30	2006	0	0.581152	0.70792	4.27778	23.1767
12	1	2006	0	0.581152	0.594653	4.72222	1.26
12	2	2006	0	0.357632	0.481386	5.72222	1.26
12	3	2006	0	0.491744	0.453069	6.77778	1.26
12	4	2006	0	0.849376	0.481386	6.61111	1.26
12	5	2006	0	0.759968	0.368118	6.77778	1.26
12	6	2006	0	0.581152	0.62297	7.16667	1.26
12	7	2006	0	0.759968	1.55742	7.5	1.26
12	8	2006	0	1.78816	2.12376	9.88889	1.26
12	9	2006	0	2.14579	1.98218	15.2222	1.26
12	10	2006	8.636	2.01168	1.69901	10.7222	1.26
12	11	2006	3.048	1.47523	1.89723	7.5	1.26
12	12	2006	0	1.60934	1.04772	7.16667	1.26
12	13	2006	0	0.625856	1.38752	8.83333	1.26
12	14	2006	0	0.983488	2.43524	11.6111	1.26
12	15	2006	0	0.804672	3.1998	11.1111	1.26
12	16	2006	0	2.72694	3.1998	8.83333	1.26
12	17	2006	0	1.87757	3.22812	6.38889	1.26
12	18	2006	0	1.0729	4.92712	3.61111	1.26
12	19	2006	0	1.1176	6.82435	3.44444	1.26
12	20	2006	0	0.89408	6.9093	4.11111	1.26
12	21	2006	0	1.1176	6.99425	3.77778	1.26
12	22	2006	5.08	2.2799	7.02257	7	1.26
12	23	2006	0	1.02819	6.45623	4.61111	1.26
12	24	2006	0	1.1176	5.91821	3.61111	1.26
12	25	2006	0	0.625856	5.91821	3.83333	1.26
12	26	2006	0	1.96698	5.77663	9.44444	1.26
12	27	2006	2.286	2.77165	5.35188	10.7222	1.26
12	28	2006	3.556	2.77165	4.87049	6.22222	1.26
12	29	2006	0	0.804672	4.33247	3.83333	1.26
12	30	2006	0	0.938784	3.96435	4	1.26
12	31	2006	0	0.983488	3.68118	5.22222	1.26
1	1	2007	0	1.92227	3.65287	4.88889	0.1
1	2	2007	0	1.1623	3.65287	4.16667	0.1
1	3	2007	0	0.804672	3.90772	6.55556	0.1
1	4	2007	0	2.2799	4.0493	7.11111	0.1
1	5	2007	2.032	2.68224	3.73782	5.44444	0.1
1	6	2007	0	1.1176	3.76613	3.61111	0.1
1	7	2007	0	0.67056	3.8794	3.94444	0.1
1	8	2007	0	0.44704	3.62455	4.55556	0.1
1	9	2007	0	0.491744	3.51128	5.22222	0.1
1	10	2007	0	0.402336	3.56792	5.77778	0.1
1	11	2007	0	2.45872	3.68118	6.11111	0.1
1	12	2007	0	1.02819	3.8794	0.888889	0.1
1	13	2007	0	1.69875	3.8794	0.277778	0.1
1	14	2007	0	0.938784	3.8794	0.111111	0.1
1	15	2007	0	0.491744	3.8794	0.388889	0.1
1	16	2007	0	0.67056	4.27584	1.72222	0.1
1	17	2007	0	1.47523	5.32356	2.33333	0.1
1	18	2007	0	1.20701	6.59781	2.77778	0.1
1	19	2007	0	0.44704	7.81544	3.44444	0.1
1	20	2007	0	0.759968	8.49504	4.61111	0.1
1	21	2007	0	1.38582	8.38177	4.5	0.1
1	22	2007	0	0.983488	8.24019	5.05556	0.1
1	23	2007	0	0.938784	8.66494	5.77778	0.1
1	24	2007	0	0.581152	9.57108	6.5	0.1
1	25	2007	0	1.20701	9.62771	8	0.1
1	26	2007	0	1.29642	9.06138	9.05556	0.1
1	27	2007	0	1.0729	8.69326	8.72222	0.1
1	28	2007	3.556	1.65405	8.55167	10.1111	0.1
1	29	2007	2.032	1.51994	9.37286	7.88889	0.1
1	30	2007	0	1.1623	12.1762	7.72222	0.1
1	31	2007	0	1.34112	14.7531	8.5	0.1
2	1	2007	0	0.983488	14.8946	8.16667	19.2367
2	2	2007	0	1.29642	14.8663	8.33333	19.2367
2	3	2007	0	0.715264	15.2911	7.27778	19.2367
2	4	2007	0	0.715264	15.2911	8.44444	19.2367
2	5	2007	0	1.0729	14.0168	9.83333	19.2367
2	6	2007	0	1.51994	11.4966	12.2778	19.2367
2	7	2007	0	0.983488	9.17464	12.1111	19.2367
2	8	2007	1.778	1.47523	7.19247	10.5	19.2367
2	9	2007	0	1.56464	5.69168	12.1111	19.2367
2	10	2007	0	1.83286	5.09702	12.7222	19.2367
2	11	2007	19.812	2.59283	4.95544	14.0556	19.2367
2	12	2007	0	0.759968	5.35188	10.7778	19.2367
2	13	2007	0	2.99517	6.65445	11.0556	19.2367
2	14	2007	0	1.56464	8.01365	9.33333	19.2367
2	15	2007	0	1.1176	8.66494	9.72222	19.2367
2	16	2007	0	0.67056	9.03306	11.0556	19.2367
2	17	2007	0	0.536448	9.23128	12.2222	19.2367
2	18	2007	0	1.65405	9.23128	13.6111	19.2367
2	19	2007	0	3.44221	10.5905	10.6667	19.2367
2	20	2007	0	1.34112	11.7798	8.83333	19.2367
2	21	2007	0	0.67056	10.7887	9.55556	19.2367
2	22	2007	0	2.41402	9.37286	10.7778	19.2367
2	23	2007	5.334	2.63754	8.29682	7.38889	19.2367
2	24	2007	0	2.36931	6.7394	5.77778	19.2367
2	25	2007	0	2.36931	6.03148	9.5	19.2367
2	26	2007	0.254	1.78816	5.71999	8.77778	19.2367
2	27	2007	3.556	3.3081	5.15366	10.5556	19.2367
2	28	2007	0.762	1.92227	4.81386	7.5	19.2367
3	1	2007	0	1.92227	4.61564	6.11111	49.1233
3	2	2007	0	1.69875	5.06871	6.88889	49.1233
3	3	2007	0	0.804672	5.32356	8.88889	49.1233
3	4	2007	0	1.02819	6.34296	12.2778	49.1233
3	5	2007	0	1.65405	7.19247	15.1111	49.1233
3	6	2007	0	0.804672	7.10752	15.2778	49.1233
3	7	2007	0	1.34112	6.96593	16.3889	49.1233
3	8	2007	0	1.78816	6.79603	14.5	49.1233
3	9	2007	0	1.69875	6.54118	13.1667	49.1233
3	10	2007	0	1.69875	6.2297	12.1667	49.1233
3	11	2007	0	0.759968	6.20138	14.2222	49.1233
3	12	2007	0	1.1176	5.74831	16	49.1233
3	13	2007	0	1.25171	4.89881	18.1111	49.1233
3	14	2007	0	1.0729	4.50237	19.2222	49.1233
3	15	2007	0	1.78816	4.33247	17.1111	49.1233
3	16	2007	0	1.29642	3.90772	19.2222	49.1233
3	17	2007	0	1.65405	3.68118	19.8889	49.1233
3	18	2007	0	1.78816	3.85108	19.1111	49.1233
3	19	2007	0	1.78816	3.90772	17.2222	49.1233
3	20	2007	0.508	2.50342	2.86	16.1111	49.1233
3	21	2007	5.842	2.2352	2.43524	11.5	49.1233
3	22	2007	0.254	1.0729	2.46356	12.2222	49.1233
3	23	2007	0	1.51994	2.54851	14.9444	49.1233
3	24	2007	0	1.38582	2.54851	17.5556	49.1233
3	25	2007	0	1.60934	2.83168	17.2778	49.1233
3	26	2007	0	1.87757	3.42633	15.7222	49.1233
3	27	2007	1.778	4.69392	3.62455	11.3889	49.1233
3	28	2007	1.016	2.54813	3.76613	9.05556	49.1233
3	29	2007	0	1.34112	3.85108	12.1667	49.1233
3	30	2007	0	0.804672	3.76613	14.3333	49.1233
3	31	2007	0	1.20701	3.79445	16.4444	49.1233
4	1	2007	0	1.20701	4.02099	18	38.42
4	2	2007	0	2.50342	4.47405	18	38.42
4	3	2007	0	1.34112	4.78554	17.1111	38.42
4	4	2007	0	0.983488	5.83326	18.5556	38.42
4	5	2007	0	0.804672	6.88098	18.4444	38.42
4	6	2007	0	1.47523	7.02257	19.1111	38.42
4	7	2007	0	3.21869	6.99425	19.9444	38.42
4	8	2007	0	2.63754	8.12692	18.7778	38.42
4	9	2007	0	3.3528	10.279	17.2778	38.42
4	10	2007	0	2.86106	11.4683	15.5556	38.42
4	11	2007	0	2.2352	12.7142	15.1111	38.42
4	12	2007	0	5.05155	13.4222	12.7222	38.42
4	13	2007	0	2.2799	12.0063	12.4444	38.42
4	14	2007	0	2.05638	9.74098	14.2778	38.42
4	15	2007	0.254	3.57632	8.60831	10.8889	38.42
4	16	2007	0	1.87757	8.72157	13.8889	38.42
4	17	2007	0	1.47523	7.70217	17.3889	38.42
4	18	2007	0	5.90093	6.37128	12.3333	38.42
4	19	2007	0	2.72694	5.55009	10.4444	38.42
4	20	2007	0	2.2799	4.89881	12.0556	38.42
4	21	2007	0	1.20701	4.47405	12.4444	38.42
4	22	2007	3.048	2.36931	4.44574	14.3333	38.42
4	23	2007	5.842	2.32461	4.30415	12.2222	38.42
4	24	2007	0	1.29642	4.70059	16.0556	38.42
4	25	2007	0	1.43053	5.01207	18.2222	38.42
4	26	2007	0.508	2.41402	5.12534	17.1667	38.42
4	27	2007	0	0.983488	5.35188	19.9444	38.42
4	28	2007	0	1.56464	5.60673	23.8889	38.42
4	29	2007	0	1.78816	5.46514	24.5556	38.42
4	30	2007	0	1.96698	5.40851	21.6111	38.42
5	1	2007	0	1.87757	5.86158	21.5	41.37
5	2	2007	0	3.08458	6.93762	19.5556	41.37
5	3	2007	0	4.69392	8.52336	14.6111	41.37
5	4	2007	0	2.50342	9.37286	14.2778	41.37
5	5	2007	1.016	2.90576	9.08969	13.9444	41.37
5	6	2007	0	2.01168	8.94811	17.2778	41.37
5	7	2007	0	1.1623	9.08969	20.2778	41.37
5	8	2007	0	1.69875	8.21187	23.0556	41.37
5	9	2007	0	1.92227	7.78712	24.5	41.37
5	10	2007	0	1.83286	8.18356	24	41.37
5	11	2007	0	2.2352	8.77821	22.0556	41.37
5	12	2007	0	2.45872	8.60831	20.4444	41.37
5	13	2007	0	3.03987	8.46672	18.8333	41.37
5	14	2007	0	1.83286	9.91088	21	41.37
5	15	2007	0	1.51994	12.3744	22.3889	41.37
5	16	2007	0	3.08458	13.7336	21.6667	41.37
5	17	2007	0	3.03987	13.9319	21.8889	41.37
5	18	2007	0	2.81635	14.2717	21.3889	41.37
5	19	2007	0	2.99517	13.5354	20.7778	41.37
5	20	2007	0	2.72694	12.6859	21.8889	41.37
5	21	2007	0	4.15747	12.063	21.7778	41.37
5	22	2007	0	2.72694	11.5533	20.3889	41.37
5	23	2007	0	2.1905	11.7232	20.1111	41.37
5	24	2007	0	1.25171	11.4117	21.9444	41.37
5	25	2007	0	1.83286	12.063	24.1667	41.37
5	26	2007	0	2.36931	12.4028	24.8889	41.37
5	27	2007	0	2.1905	12.063	24	41.37
5	28	2007	0	1.69875	13.0824	22.6111	41.37
5	29	2007	0	1.78816	14.5548	23.4444	41.37
5	30	2007	0	2.54813	15.999	22.8333	41.37
5	31	2007	0	2.68224	17.0184	22.0556	41.37
6	1	2007	0	2.01168	17.16	23.7778	120.483
6	2	2007	0	2.10109	17.075	24.1111	120.483
6	3	2007	0	2.50342	17.1883	24.7778	120.483
6	4	2007	0	2.54813	17.6697	24.7222	120.483
6	5	2007	0	3.53162	16.7635	23.3889	120.483
6	6	2007	0	5.31978	15.3477	17.7222	120.483
6	7	2007	0	3.03987	13.7336	17.3889	120.483
6	8	2007	0	1.29642	12.0063	20.5	120.483
6	9	2007	0	1.87757	10.9586	22.3889	120.483
6	10	2007	0	2.45872	9.5994	24.1111	120.483
6	11	2007	0	2.72694	10.9303	24.7778	120.483
6	12	2007	0	2.90576	13.1956	25.3333	120.483
6	13	2007	0	1.51994	14.4982	26.6111	120.483
6	14	2007	0	1.96698	15.1495	27.8889	120.483
6	15	2007	0	2.14579	15.3477	29.7222	120.483
6	16	2007	0	2.10109	15.461	28.5	120.483
6	17	2007	0	2.77165	15.8857	25.5	120.483
6	18	2007	0	1.38582	16.3671	25.5556	120.483
6	19	2007	0	1.69875	16.4804	26.8333	120.483
6	20	2007	0	2.10109	16.537	24.8333	120.483
6	21	2007	0	2.45872	17.4998	24.8333	120.483
6	22	2007	0	2.32461	17.9812	25.3333	120.483
6	23	2007	0	2.10109	17.8396	25.0556	120.483
6	24	2007	0	3.3528	17.613	24.4444	120.483
6	25	2007	0	2.72694	17.3299	22.8889	120.483
6	26	2007	0	1.29642	16.6503	24.8889	120.483
6	27	2007	0	2.41402	15.7725	25.5556	120.483
6	28	2007	0	3.03987	15.6026	25.0556	120.483
6	29	2007	0	2.90576	15.376	24.7778	120.483
6	30	2007	0	2.90576	15.1495	24.7222	120.483
7	1	2007	0	2.36931	15.3477	24.2222	138.973
7	2	2007	0	2.2799	15.5742	24.1111	138.973
7	3	2007	0	2.2799	15.914	26.2222	138.973
7	4	2007	0	1.87757	16.4804	27.5556	138.973
7	5	2007	0	1.20701	16.622	30.7222	138.973
7	6	2007	0	1.34112	16.9901	32.3333	138.973
7	7	2007	0	1.96698	17.2449	28.6667	138.973
7	8	2007	0	1.92227	16.8768	26.5556	138.973
7	9	2007	0	1.60934	16.8202	27.7222	138.973
7	10	2007	0	1.78816	16.7352	27.5	138.973
7	11	2007	0	1.69875	16.2822	25.3333	138.973
7	12	2007	0	2.63754	15.6026	24.2222	138.973
7	13	2007	0	2.45872	13.762	24.4444	138.973
7	14	2007	0	2.10109	12.7142	26.0556	138.973
7	15	2007	0	2.2352	12.9691	26.3889	138.973
7	16	2007	0	2.45872	14.3283	26.6111	138.973
7	17	2007	0	3.21869	15.2911	25.0556	138.973
7	18	2007	0	2.86106	15.6592	24.2778	138.973
7	19	2007	0	3.17398	15.7441	23.8889	138.973
7	20	2007	0	2.59283	14.8946	24.5556	138.973
7	21	2007	0	2.54813	13.2806	24.8889	138.973
7	22	2007	0	2.32461	13.0824	26.0556	138.973
7	23	2007	0	2.59283	14.215	27.7222	138.973
7	24	2007	0	0.983488	14.8663	27.1111	138.973
7	25	2007	0	2.32461	14.838	28.2778	138.973
7	26	2007	0	2.10109	14.838	27.2222	138.973
7	27	2007	0	2.01168	14.7531	27.2222	138.973
7	28	2007	0	2.36931	14.1584	27.3889	138.973
7	29	2007	0	2.50342	13.3655	27.8889	138.973
7	30	2007	0	2.41402	13.0824	27	138.973
7	31	2007	0	1.78816	12.9974	28.1111	138.973
8	1	2007	0	1.87757	13.6487	28.2778	117.847
8	2	2007	0	1.87757	15.2061	28.3333	117.847
8	3	2007	0	1.47523	15.2628	27.3889	117.847
8	4	2007	0	1.87757	14.3849	28.4444	117.847
8	5	2007	0	2.2799	14.6115	27.5556	117.847
8	6	2007	0	2.86106	14.4133	22.6111	117.847
8	7	2007	0	2.72694	12.1196	21.1667	117.847
8	8	2007	0	2.54813	9.88256	22.6667	117.847
8	9	2007	0	2.10109	9.62771	24.2222	117.847
8	10	2007	0	2.05638	10.8737	25.0556	117.847
8	11	2007	0	2.45872	11.7515	25.7778	117.847
8	12	2007	0	2.45872	11.7232	23.6111	117.847
8	13	2007	0	1.92227	12.9408	24.3889	117.847
8	14	2007	0	1.74346	14.8946	25.3889	117.847
8	15	2007	0	1.51994	15.9424	26.0556	117.847
8	16	2007	0	2.50342	16.0556	24.8333	117.847
8	17	2007	0	1.60934	15.999	23.6667	117.847
8	18	2007	0	1.0729	14.923	23.8333	117.847
8	19	2007	0	2.1905	13.6487	23.2778	117.847
8	20	2007	0	1.83286	12.1479	23.8889	117.847
8	21	2007	0	1.34112	11.1285	25.7778	117.847
8	22	2007	0	1.43053	10.8453	27.6667	117.847
8	23	2007	0	1.78816	9.34454	28.0556	117.847
8	24	2007	0	1.96698	7.78712	26.7778	117.847
8	25	2007	0	1.43053	6.99425	27.4444	117.847
8	26	2007	0	1.1623	6.59781	26.8889	117.847
8	27	2007	0	1.51994	6.71108	26.7222	117.847
8	28	2007	0	1.74346	5.43683	28.2778	117.847
8	29	2007	0	1.25171	4.81386	29.3889	117.847
8	30	2007	0	2.86106	4.87049	31.5556	117.847
8	31	2007	0.254	1.56464	5.26692	29.3889	117.847
9	1	2007	0	2.95046	5.38019	32.2222	91.9667
9	2	2007	0	2.2352	5.32356	28.9444	91.9667
9	3	2007	0	1.78816	5.26692	27.3889	91.9667
9	4	2007	0	3.3975	5.94653	26.9444	91.9667
9	5	2007	0	2.45872	6.93762	23.4444	91.9667
9	6	2007	0	0.715264	7.02257	23.4444	91.9667
9	7	2007	0	2.08991	7.2491	24.375	91.9667
9	8	2007	0	1.69875	7.44732	24.0556	91.9667
9	9	2007	0	1.4417	7.2491	24.4028	91.9667
9	10	2007	0	1.78816	6.7394	23.6667	91.9667
9	11	2007	0	1.83286	6.59781	25.6667	91.9667
9	12	2007	0	1.43053	6.59781	24.8333	91.9667
9	13	2007	0	3.3081	6.76772	22	91.9667
9	14	2007	0	2.45872	7.90039	20.2778	91.9667
9	15	2007	0	1.74346	8.83484	20.4444	91.9667
9	16	2007	0	1.60934	9.00474	20.3889	91.9667
9	17	2007	0	2.68224	8.80652	20.2222	91.9667
9	18	2007	0	1.43053	8.41009	21.6667	91.9667
9	19	2007	0	1.56464	7.84375	19.4444	91.9667
9	20	2007	0	2.36931	8.04197	15.6667	91.9667
9	21	2007	0	1.87757	8.55167	17.3333	91.9667
9	22	2007	0	2.1905	8.57999	17.4444	91.9667
9	23	2007	14.478	1.20701	8.32514	16.3889	91.9667
9	24	2007	0	1.83286	7.61722	17.4444	91.9667
9	25	2007	0	1.25171	6.79603	19.0556	91.9667
9	26	2007	0	1.02819	5.88989	20.3333	91.9667
9	27	2007	0	1.02819	5.49346	20.8333	91.9667
9	28	2007	0	1.92227	5.55009	20.3889	91.9667
9	29	2007	0	3.03987	5.57841	16.8333	91.9667
9	30	2007	0	1.0729	5.63504	16.8333	91.9667
10	1	2007	0	2.01168	5.57841	18.2222	52.31
10	2	2007	0	1.92227	6.51286	18.1111	52.31
10	3	2007	0	1.29642	7.39068	19.8333	52.31
10	4	2007	0	2.72694	7.2491	18.8889	52.31
10	5	2007	0	3.79984	7.33405	15.1111	52.31
10	6	2007	0	1.38582	7.39068	11.8889	52.31
10	7	2007	0	1.1176	7.30573	14.2222	52.31
10	8	2007	0	0.759968	7.44732	15.6111	52.31
10	9	2007	0	1.20701	7.5889	18.2778	52.31
10	10	2007	0	2.14579	7.56059	17.3333	52.31
10	11	2007	0	1.87757	7.53227	15.3333	52.31
10	12	2007	0	1.78816	7.47564	16.6667	52.31
10	13	2007	1.016	1.74346	7.419	14.5556	52.31
10	14	2007	0	1.0729	7.19247	15.8889	52.31
10	15	2007	0	1.65405	6.65445	16.7222	52.31
10	16	2007	0	3.3081	6.0598	16.0556	52.31
10	17	2007	0.508	2.14579	5.21029	16.2778	52.31
10	18	2007	0	2.45872	4.95544	13.6667	52.31
10	19	2007	0	0.804672	4.87049	15.6667	52.31
10	20	2007	0	3.71043	4.87049	17.1667	52.31
10	21	2007	0	2.14579	4.84217	12.3333	52.31
10	22	2007	0	1.1176	4.87049	14.1667	52.31
10	23	2007	0	0.759968	4.92712	16.6667	52.31
10	24	2007	0	0.804672	4.95544	18.1111	52.31
10	25	2007	0	0.849376	4.89881	19.2778	52.31
10	26	2007	0	0.44704	4.84217	17.2778	52.31
10	27	2007	0	1.60934	4.84217	17.9444	52.31
10	28	2007	0.762	1.69875	4.81386	17.3333	52.31
10	29	2007	0	1.0729	4.64396	18.6667	52.31
10	30	2007	5.842	2.59283	4.53069	16.5556	52.31
10	31	2007	0	1.0729	4.58732	15.5556	52.31
11	1	2007	0	0.804672	4.559	13.6667	6.03333
11	2	2007	0	0.625856	4.53069	14.7222	6.03333
11	3	2007	0	0.625856	4.47405	15.0556	6.03333
11	4	2007	0	1.02819	4.44574	14.8889	6.03333
11	5	2007	0	0.357632	4.53069	14.6111	6.03333
11	6	2007	0	0.715264	4.67227	15	6.03333
11	7	2007	0	0.938784	4.58732	15.4444	6.03333
11	8	2007	0	0.581152	4.50237	15.5	6.03333
11	9	2007	0	1.51994	4.44574	15.4444	6.03333
11	10	2007	0	1.29642	4.41742	12.4444	6.03333
11	11	2007	0	1.43053	4.41742	14	6.03333
11	12	2007	0	1.38582	4.41742	12.6667	6.03333
11	13	2007	0	0.44704	4.64396	12.7778	6.03333
11	14	2007	0	0.22352	4.84217	13.7222	6.03333
11	15	2007	0	1.02819	4.84217	14.4444	6.03333
11	16	2007	0	1.0729	4.84217	15.3889	6.03333
11	17	2007	0	1.1623	4.81386	13.3889	6.03333
11	18	2007	0	0.715264	4.84217	13.7778	6.03333
11	19	2007	0	0.67056	4.89881	12.7222	6.03333
11	20	2007	0	1.74346	4.92712	13.6111	6.03333
11	21	2007	0	1.56464	5.01207	11.8333	6.03333
11	22	2007	0	0.89408	5.01207	9.61111	6.03333
11	23	2007	0	1.38582	5.01207	8.44444	6.03333
11	24	2007	0	1.1176	4.98376	8.77778	6.03333
11	25	2007	0	0.536448	4.92712	9.27778	6.03333
11	26	2007	0	0.625856	4.92712	8.5	6.03333
11	27	2007	0	1.43053	4.87049	7.72222	6.03333
11	28	2007	0.508	0.938784	4.84217	7.55556	6.03333
11	29	2007	0	1.29642	4.81386	7.22222	6.03333
11	30	2007	0	1.65405	4.3891	7.33333	6.03333
12	1	2007	0	1.0729	3.00158	4.33333	8.09
12	2	2007	0	1.83286	2.94495	6.38889	8.09
12	3	2007	0	1.20701	2.91663	7.83333	8.09
12	4	2007	0	1.0729	3.08653	8.72222	8.09
12	5	2007	0	1.38582	2.94495	12.3333	8.09
12	6	2007	0	1.1176	2.88831	10.0556	8.09
12	7	2007	3.048	3.79984	2.80336	11.8333	8.09
12	8	2007	3.556	1.69875	2.6901	8.77778	8.09
12	9	2007	0	1.60934	2.6901	4.27778	8.09
12	10	2007	0	0.715264	3.08653	5.38889	8.09
12	11	2007	0	1.1623	3.82277	4.88889	8.09
12	12	2007	0	0.938784	4.2192	5.05556	8.09
12	13	2007	0	0.759968	4.24752	3.77778	8.09
12	14	2007	0	0.357632	4.24752	4.05556	8.09
12	15	2007	0	0.491744	4.0493	5.27778	8.09
12	16	2007	0	0.67056	3.85108	4.94444	8.09
12	17	2007	0	2.63754	3.82277	7.66667	8.09
12	18	2007	0	1.87757	3.85108	10.9444	8.09
12	19	2007	0	1.87757	3.73782	11.3889	8.09
12	20	2007	0	2.2799	3.68118	9.83333	8.09
12	21	2007	2.286	2.01168	3.73782	5.33333	8.09
12	22	2007	0	0.89408	3.8794	2.83333	8.09
12	23	2007	0	0.625856	3.99267	3.38889	8.09
12	24	2007	0	0.67056	3.85108	3.22222	8.09
12	25	2007	0	1.1623	3.76613	6.22222	8.09
12	26	2007	0	0.938784	3.7095	3.83333	8.09
12	27	2007	0	1.87757	3.65287	2	8.09
12	28	2007	0	1.38582	3.62455	4.77778	8.09
12	29	2007	0	0.536448	3.65287	6.27778	8.09
12	30	2007	0	1.25171	3.68118	7.27778	8.09
12	31	2007	0	2.14579	3.68118	7.44444	8.09
1	1	2008	0	0.715264	3.73782	4.27778	0
1	2	2008	0	0.938784	3.59623	5.27778	0
1	3	2008	0	0.938784	3.42633	9.55556	0
1	4	2008	0	2.59283	3.45465	10.8889	0
1	5	2008	12.954	3.3081	3.00158	11.3889	0
1	6	2008	1.524	2.41402	2.94495	10.2778	0
1	7	2008	0.254	1.83286	2.94495	8.38889	0
1	8	2008	0	1.51994	2.97326	6.94444	0
1	9	2008	1.27	1.83286	3.00158	8.94444	0
1	10	2008	0	1.02819	3.05821	7.5	0
1	11	2008	0	0.312928	3.08653	8.38889	0
1	12	2008	0	1.74346	3.11485	9.16667	0
1	13	2008	0	0.759968	3.14316	10.3889	0
1	14	2008	0	0.491744	3.17148	6.94444	0
1	15	2008	0	0.759968	3.17148	6.94444	0
1	16	2008	0	0.938784	3.1998	6.83333	0
1	17	2008	0	1.34112	3.22812	4.55556	0
1	18	2008	0	0.715264	2.88831	3.61111	0
1	19	2008	0	0.581152	2.63346	4.61111	0
1	20	2008	0	1.20701	2.60515	7.05556	0
1	21	2008	0	2.50342	2.88831	7.22222	0
1	22	2008	0	1.78816	3.11485	7	0
1	23	2008	0	2.54813	3.5396	8.11111	0
1	24	2008	8.128	3.26339	3.73782	6.5	0
1	25	2008	1.524	3.53162	3.62455	9.22222	0
1	26	2008	0	2.1905	3.79445	10.1667	0
1	27	2008	0	1.92227	3.8794	13.2778	0
1	28	2008	4.318	3.3975	3.51128	8.72222	0
1	29	2008	0.508	1.1623	3.34138	4.05556	0
1	30	2008	0	1.83286	3.34138	7.22222	0
1	31	2008	0	1.60934	3.39802	5.27778	0
2	1	2008	0	1.74346	3.68118	9	0.61
2	2	2008	0	1.43053	4.16257	5.5	0.61
2	3	2008	7.112	3.48691	5.18197	8.55556	0.61
2	4	2008	5.08	2.14579	5.86158	7.38889	0.61
2	5	2008	0.508	1.25171	5.91821	5.27778	0.61
2	6	2008	0	0.268224	6.0598	6.5	0.61
2	7	2008	0	0.67056	6.25801	7.77778	0.61
2	8	2008	0	0.44704	6.3996	9.22222	0.61
2	9	2008	0	0.804672	6.62613	8.88889	0.61
2	10	2008	0	0.625856	6.76772	9.61111	0.61
2	11	2008	0	0.849376	7.39068	9.72222	0.61
2	12	2008	0	0.536448	8.07029	10.3889	0.61
2	13	2008	0	1.51994	8.38177	11.3889	0.61
2	14	2008	0	3.21869	8.46672	7.77778	0.61
2	15	2008	0	1.51994	8.80652	7.38889	0.61
2	16	2008	0	1.02819	9.14633	8.61111	0.61
2	17	2008	0	0.938784	9.45781	9.27778	0.61
2	18	2008	0	0.625856	9.79761	10.6111	0.61
2	19	2008	0	1.60934	10.3923	10.8889	0.61
2	20	2008	2.794	1.51994	11.4683	10.3333	0.61
2	21	2008	2.794	2.05638	11.4966	9.27778	0.61
2	22	2008	0.508	2.05638	10.902	11.6111	0.61
2	23	2008	1.016	2.01168	9.71266	8.5	0.61
2	24	2008	0	3.26339	8.24019	12.2778	0.61
2	25	2008	0	1.47523	7.419	10.8333	0.61
2	26	2008	0	0.983488	7.2491	10.4444	0.61
2	27	2008	0	1.1176	7.2491	11.8889	0.61
2	28	2008	0	1.02819	7.30573	12.1111	0.61
2	29	2008	0	1.20701	7.56059	13.8333	0.61
3	1	2008	0	2.68224	7.95702	14.2778	30.7733
3	2	2008	0	2.50342	8.46672	9.72222	30.7733
3	3	2008	0	1.1623	9.08969	9.94444	30.7733
3	4	2008	0	1.29642	8.77821	10.9444	30.7733
3	5	2008	0	1.65405	7.81544	11.2222	30.7733
3	6	2008	0	1.34112	7.70217	11.7222	30.7733
3	7	2008	0	1.60934	8.80652	12.3889	30.7733
3	8	2008	0	1.92227	8.94811	12.7222	30.7733
3	9	2008	0	1.87757	9.17464	12.6111	30.7733
3	10	2008	0	0.849376	9.51444	14	30.7733
3	11	2008	0	1.74346	9.28791	15.1111	30.7733
3	12	2008	0	0.983488	9.08969	14.6111	30.7733
3	13	2008	0	1.25171	8.60831	15.5	30.7733
3	14	2008	0	4.4257	7.73049	13.8889	30.7733
3	15	2008	0	3.66573	7.0792	10.8889	30.7733
3	16	2008	0	1.96698	5.71999	7.22222	30.7733
3	17	2008	0	2.01168	5.83326	9.77778	30.7733
3	18	2008	0	1.56464	5.40851	12.2222	30.7733
3	19	2008	0	1.74346	4.98376	14.1111	30.7733
3	20	2008	0	2.99517	4.36079	13.9444	30.7733
3	21	2008	0	1.60934	3.8794	11.4444	30.7733
3	22	2008	0	1.20701	3.76613	12.8889	30.7733
3	23	2008	0	1.34112	3.73782	14.8333	30.7733
3	24	2008	0	1.1623	3.59623	15.4444	30.7733
3	25	2008	0	1.60934	3.51128	14.7222	30.7733
3	26	2008	0	2.68224	3.7095	13.4444	30.7733
3	27	2008	0	3.75514	4.02099	12.1667	30.7733
3	28	2008	0	1.38582	4.10594	10.8333	30.7733
3	29	2008	0	1.47523	4.02099	15.2778	30.7733
3	30	2008	0	2.59283	4.10594	13.7222	30.7733
3	31	2008	0	1.69875	4.41742	10.4444	30.7733
4	1	2008	0	1.25171	4.72891	12.2778	86.25
4	2	2008	0	1.78816	6.17306	13.1111	86.25
4	3	2008	0	1.74346	7.22078	14.9444	86.25
4	4	2008	0	1.65405	8.07029	15.3889	86.25
4	5	2008	0	3.17398	8.41009	14.3889	86.25
4	6	2008	0	2.32461	7.56059	13.4444	86.25
4	7	2008	0	3.26339	7.13583	12.9444	86.25
4	8	2008	0	2.32461	7.64554	12.1667	86.25
4	9	2008	0	3.53162	8.55167	11.2778	86.25
4	10	2008	0	2.32461	8.94811	13.3333	86.25
4	11	2008	0	1.25171	9.00474	16.3889	86.25
4	12	2008	0	1.38582	9.08969	19.1111	86.25
4	13	2008	0	1.34112	9.08969	20.8333	86.25
4	14	2008	0	2.14579	9.23128	21.4444	86.25
4	15	2008	0	5.00685	9.71266	14.2778	86.25
4	16	2008	0	1.78816	10.1091	11.6111	86.25
4	17	2008	0	1.0729	10.194	15.8333	86.25
4	18	2008	0	1.69875	10.279	18.2778	86.25
4	19	2008	0	1.96698	9.74098	16.6111	86.25
4	20	2008	0	4.60451	8.55167	11.9444	86.25
4	21	2008	0	2.32461	7.50395	10.1667	86.25
4	22	2008	0	1.69875	6.85267	12.1667	86.25
4	23	2008	0	2.41402	6.28633	15.2222	86.25
4	24	2008	0	3.88925	6.00316	13.5556	86.25
4	25	2008	0	1.43053	5.63504	14.5556	86.25
4	26	2008	0	1.69875	4.92712	17.6667	86.25
4	27	2008	0	1.38582	4.98376	21.6667	86.25
4	28	2008	0	1.51994	4.41742	23.5	86.25
4	29	2008	0	4.24688	4.47405	21	86.25
4	30	2008	0	5.09626	4.72891	15.0556	86.25
5	1	2008	0	2.05638	4.78554	13.3333	80.5267
5	2	2008	0	1.51994	5.46514	17	80.5267
5	3	2008	0	2.01168	5.77663	18.4444	80.5267
5	4	2008	0	2.01168	5.63504	18.3333	80.5267
5	5	2008	0	2.32461	5.97484	17.4444	80.5267
5	6	2008	0	1.47523	6.34296	19.8889	80.5267
5	7	2008	0	3.3081	7.33405	21.2222	80.5267
5	8	2008	0	2.86106	10.0808	18.1667	80.5267
5	9	2008	0	2.45872	10.194	20.1667	80.5267
5	10	2008	0	2.59283	9.17464	19.4444	80.5267
5	11	2008	0	1.1623	7.9287	20.8889	80.5267
5	12	2008	0	3.03987	7.56059	19.1667	80.5267
5	13	2008	0	2.54813	7.67385	18.5	80.5267
5	14	2008	0	1.78816	7.44732	21.7778	80.5267
5	15	2008	0	1.38582	8.83484	24.7778	80.5267
5	16	2008	0	1.74346	10.9869	28.3333	80.5267
5	17	2008	0	1.69875	11.8647	28.9444	80.5267
5	18	2008	0	2.36931	12.2045	29.2778	80.5267
5	19	2008	0	2.10109	14.1867	27.7222	80.5267
5	20	2008	0	2.72694	13.4222	27.2222	80.5267
5	21	2008	0	6.03504	12.0346	21.1111	80.5267
5	22	2008	0	4.02336	11.44	19.1667	80.5267
5	23	2008	0	3.03987	12.4594	18.6667	80.5267
5	24	2008	0	2.45872	11.9497	17.5556	80.5267
5	25	2008	0	3.17398	11.8931	14.4444	80.5267
5	26	2008	0	1.38582	11.4117	13.5556	80.5267
5	27	2008	0	1.51994	9.40118	17.2778	80.5267
5	28	2008	1.016	2.41402	7.87207	17	80.5267
5	29	2008	0	2.54813	7.61722	17.9444	80.5267
5	30	2008	0	2.01168	7.22078	18.4444	80.5267
5	31	2008	0	1.96698	7.419	20.1111	80.5267
6	1	2008	0	2.77165	9.40118	20.6111	43.29
6	2	2008	0	2.90576	11.5533	20.6111	43.29
6	3	2008	0	2.99517	12.9691	21.2222	43.29
6	4	2008	0	4.87274	13.3089	21.2778	43.29
6	5	2008	0	3.12928	13.8186	19.5	43.29
6	6	2008	0	3.75514	14.4699	22.7222	43.29
6	7	2008	0	3.3081	14.2434	20.1667	43.29
6	8	2008	0	1.60934	14.1301	21.4444	43.29
6	9	2008	0	2.1905	13.1956	24.0556	43.29
6	10	2008	0	2.99517	11.44	25.2778	43.29
6	11	2008	0	2.63754	11.6948	21.8333	43.29
6	12	2008	0	1.74346	11.6382	22.8333	43.29
6	13	2008	4.064	1.74346	11.8364	25.5	43.29
6	14	2008	0	2.36931	12.8558	27.3333	43.29
6	15	2008	0	2.1905	13.0824	26.4444	43.29
6	16	2008	0	2.2352	13.3938	26.6667	43.29
6	17	2008	0	2.63754	14.3	26.1111	43.29
6	18	2008	0	2.50342	16.1689	25.8889	43.29
6	19	2008	0	2.10109	16.8768	25.5556	43.29
6	20	2008	0	2.10109	17.3865	27.4444	43.29
6	21	2008	0	1.38582	16.8768	30.2778	43.29
6	22	2008	0	3.17398	15.6875	29.6111	43.29
6	23	2008	0	3.21869	15.2344	26.7778	43.29
6	24	2008	0	2.50342	15.1778	24.5556	43.29
6	25	2008	0	1.78816	14.6681	25.4444	43.29
6	26	2008	0	2.2799	14.3566	24.4444	43.29
6	27	2008	0	1.1623	14.0734	26.2222	43.29
6	28	2008	0	1.74346	13.5354	27.1111	43.29
6	29	2008	0	1.87757	13.5921	26.8333	43.29
6	30	2008	0	1.83286	15.2061	26.0556	43.29
7	1	2008	0	2.2352	17.16	26	126.3
7	2	2008	0	2.77165	17.783	25.6111	126.3
7	3	2008	0	2.90576	16.9051	25.5	126.3
7	4	2008	0	3.3081	15.3194	25.7778	126.3
7	5	2008	0	2.54813	14.5832	24.4444	126.3
7	6	2008	0	2.1905	14.1584	26.2778	126.3
7	7	2008	0	1.74346	13.3089	28.1111	126.3
7	8	2008	0	1.69875	11.355	31.1111	126.3
7	9	2008	0	1.69875	11.6382	31.3889	126.3
7	10	2008	0	1.38582	13.1673	32.4444	126.3
7	11	2008	0	2.45872	14.1584	29.6111	126.3
7	12	2008	0	2.10109	14.4982	28.1667	126.3
7	13	2008	0	2.32461	14.923	27.6111	126.3
7	14	2008	0	2.2799	16.4804	29.3333	126.3
7	15	2008	0	2.99517	17.3865	28.7222	126.3
7	16	2008	0	3.03987	18.0661	28.4444	126.3
7	17	2008	0	2.41402	18.859	27.2778	126.3
7	18	2008	0	2.59283	16.1689	26.8889	126.3
7	19	2008	0	1.87757	14.3	27.3333	126.3
7	20	2008	0	1.92227	13.7053	26.7778	126.3
7	21	2008	0.762	2.36931	13.9885	24.2778	126.3
7	22	2008	0	2.54813	14.215	23.8889	126.3
7	23	2008	0	1.1623	15.4043	25.5556	126.3
7	24	2008	0	1.34112	15.2628	27.1667	126.3
7	25	2008	0	2.14579	14.2434	26.5556	126.3
7	26	2008	0	2.01168	13.3655	26.7778	126.3
7	27	2008	0	2.01168	12.5727	26.6667	126.3
7	28	2008	0	2.2799	13.5921	25.3889	126.3
7	29	2008	0	2.2352	15.376	25.2222	126.3
7	30	2008	0	2.63754	16.9051	25.0556	126.3
7	31	2008	0	2.10109	17.698	25.9444	126.3
8	1	2008	0	2.50342	16.8768	25.9444	128.34
8	2	2008	0	2.01168	15.0362	26.1111	128.34
8	3	2008	0	1.83286	14.7531	26.0556	128.34
8	4	2008	0	2.45872	15.0929	26.4444	128.34
8	5	2008	0	1.96698	14.5265	28.0556	128.34
8	6	2008	0	2.1905	14.1584	27.6667	128.34
8	7	2008	0	2.2352	13.762	28.1111	128.34
8	8	2008	0	1.83286	13.4505	27.6111	128.34
8	9	2008	0	1.96698	13.8752	26.2222	128.34
8	10	2008	0	2.54813	14.6115	24.8889	128.34
8	11	2008	0	2.01168	14.4699	25.7778	128.34
8	12	2008	0	1.43053	14.923	26.5	128.34
8	13	2008	0	1.92227	16.1689	27.8333	128.34
8	14	2008	0	1.38582	15.914	29.2778	128.34
8	15	2008	0	2.01168	15.2344	30	128.34
8	16	2008	0	2.01168	14.2717	29.4444	128.34
8	17	2008	0	1.92227	13.9035	28.1111	128.34
8	18	2008	0	1.83286	14.0734	26.3889	128.34
8	19	2008	0	2.90576	14.2434	24.4444	128.34
8	20	2008	0	2.95046	15.0929	22.9444	128.34
8	21	2008	0	1.1176	15.6026	24.9444	128.34
8	22	2008	0	2.14579	15.461	26.8333	128.34
8	23	2008	0	1.74346	13.4505	26.8889	128.34
8	24	2008	0	1.78816	11.0719	27.4444	128.34
8	25	2008	0	1.83286	9.74098	27.7778	128.34
8	26	2008	0	2.50342	9.14633	26.2778	128.34
8	27	2008	0	1.87757	8.32514	26.3889	128.34
8	28	2008	0	1.47523	7.19247	28.1111	128.34
8	29	2008	0	1.20701	6.65445	28.9444	128.34
8	30	2008	0	0.759968	6.59781	29.0556	128.34
8	31	2008	0	3.03987	6.42791	26.7222	128.34
9	1	2008	0	2.32461	6.96593	20.6111	83.44
9	2	2008	0	1.56464	7.30573	21.9444	83.44
9	3	2008	0	1.65405	7.70217	23.7222	83.44
9	4	2008	0	1.43053	7.5889	24.9444	83.44
9	5	2008	0	1.69875	6.88098	25.5	83.44
9	6	2008	0	1.20701	6.82435	26.4444	83.44
9	7	2008	0	1.65405	7.90039	27.1111	83.44
9	8	2008	0	1.25171	8.74989	26.8889	83.44
9	9	2008	0	1.96698	8.97643	24.6667	83.44
9	10	2008	0	2.10109	9.71266	22.1111	83.44
9	11	2008	0	1.47523	10.0525	22.6111	83.44
9	12	2008	0	0.89408	9.68435	24.3889	83.44
9	13	2008	0	1.20701	8.97643	23.1111	83.44
9	14	2008	0	1.25171	7.84375	23.2778	83.44
9	15	2008	0	1.0729	7.39068	24.2778	83.44
9	16	2008	0	0.89408	7.05088	25.2778	83.44
9	17	2008	0	1.74346	8.29682	24.1667	83.44
9	18	2008	0	2.14579	10.1657	20.6667	83.44
9	19	2008	0	1.38582	11.2701	21.3333	83.44
9	20	2008	0	3.08458	12.2329	20.2778	83.44
9	21	2008	0	2.2799	12.5727	19.6111	83.44
9	22	2008	0	1.87757	12.9691	19.8889	83.44
9	23	2008	0	1.38582	12.1762	20.4444	83.44
9	24	2008	0	1.20701	10.5622	22.1111	83.44
9	25	2008	0	1.38582	10.4206	23.9444	83.44
9	26	2008	0	1.1176	10.2507	23.4444	83.44
9	27	2008	0	1.1176	10.1091	23.5	83.44
9	28	2008	0	0.983488	9.5994	24.3333	83.44
9	29	2008	0	1.20701	9.28791	24.1667	83.44
9	30	2008	0	1.02819	9.57108	24.5	83.44
10	1	2008	0	1.47523	9.42949	24.7778	40.25
10	2	2008	0	2.10109	8.72157	25.2778	40.25
10	3	2008	0	2.54813	8.18356	21.0556	40.25
10	4	2008	0	1.60934	7.33405	19.8889	40.25
10	5	2008	0	2.72694	6.9093	17.1667	40.25
10	6	2008	0	1.38582	7.05088	17.7778	40.25
10	7	2008	0	1.0729	6.68276	19.3889	40.25
10	8	2008	0	1.0729	6.2297	20.6667	40.25
10	9	2008	0	2.81635	6.03148	20.2222	40.25
10	10	2008	0	3.62102	5.94653	14	40.25
10	11	2008	0	2.14579	6.00316	10.3333	40.25
10	12	2008	0	1.51994	6.14475	10.5	40.25
10	13	2008	0	1.29642	6.31465	12.5556	40.25
10	14	2008	0	1.0729	6.3996	13.9444	40.25
10	15	2008	0	0.983488	6.31465	16.2778	40.25
10	16	2008	0	1.1176	6.37128	17.3333	40.25
10	17	2008	0	1.02819	6.34296	18.8889	40.25
10	18	2008	0	1.60934	6.08811	19.6111	40.25
10	19	2008	0	1.02819	6.00316	17.6111	40.25
10	20	2008	0	1.1623	5.94653	16.1111	40.25
10	21	2008	0	1.47523	5.91821	15.4444	40.25
10	22	2008	0	0.625856	5.80494	16.6667	40.25
10	23	2008	0	0.804672	5.69168	17.3889	40.25
10	24	2008	0	0.983488	5.63504	18.0556	40.25
10	25	2008	0	0.89408	5.55009	18.2222	40.25
10	26	2008	0	1.1176	5.49346	18.4444	40.25
10	27	2008	0	1.1623	5.46514	17.5	40.25
10	28	2008	0	1.02819	5.40851	16.4444	40.25
10	29	2008	0	0.715264	5.35188	16.9444	40.25
10	30	2008	0	1.34112	5.80494	17.8889	40.25
10	31	2008	2.286	2.41402	6.17306	20.3889	40.25
11	1	2008	0	1.25171	6.54118	19.2778	13.18
11	2	2008	9.906	2.36931	7.16415	17.8889	13.18
11	3	2008	0	1.78816	7.44732	13.3889	13.18
11	4	2008	8.128	3.12928	7.419	14.3889	13.18
11	5	2008	0	1.78816	7.50395	8.77778	13.18
11	6	2008	0	0.938784	7.95702	10.2778	13.18
11	7	2008	0	0.625856	8.63662	11.7222	13.18
11	8	2008	0	0.536448	9.06138	12.5	13.18
11	9	2008	2.032	3.21869	9.17464	13.5556	13.18
11	10	2008	0	0.89408	9.48613	12.4444	13.18
11	11	2008	0	0.581152	9.9392	11.5556	13.18
11	12	2008	0	0.759968	9.34454	11.8889	13.18
11	13	2008	0	0.581152	8.52336	11.8333	13.18
11	14	2008	0	0.849376	7.98534	13	13.18
11	15	2008	0	0.402336	7.0792	13.7778	13.18
11	16	2008	0	0.44704	6.45623	14.8333	13.18
11	17	2008	0	0.491744	6.37128	15.3333	13.18
11	18	2008	0	0.357632	5.57841	14.8889	13.18
11	19	2008	0	0.581152	3.34138	14.2222	13.18
11	20	2008	0	1.1623	1.89723	13	13.18
11	21	2008	0	0.44704	1.67069	11.2222	13.18
11	22	2008	0	0.67056	1.64237	10.0556	13.18
11	23	2008	0	0.536448	1.64237	9.72222	13.18
11	24	2008	0	0.804672	1.61406	8.83333	13.18
11	25	2008	0	0.89408	1.67069	11.1111	13.18
11	26	2008	12.7	1.25171	2.18039	13.0556	13.18
11	27	2008	10.16	1.02819	1.55742	12.6667	13.18
11	28	2008	0	0.715264	1.95386	12.3889	13.18
11	29	2008	0	0.581152	2.18039	11.7222	13.18
11	30	2008	0	0.804672	2.09544	9.38889	13.18
12	1	2008	0	1.0729	1.92554	11.3333	3.83
12	2	2008	0	1.38582	1.81228	9.66667	3.83
12	3	2008	0	1.0729	1.81228	10	3.83
12	4	2008	0	0.89408	1.50079	9.72222	3.83
12	5	2008	0	0.402336	1.0194	5.66667	3.83
12	6	2008	0	0.759968	1.07604	6.05556	3.83
12	7	2008	0	1.56464	1.18931	6.66667	3.83
12	8	2008	0	0.715264	1.41584	6.11111	3.83
12	9	2008	0	0.759968	1.52911	7.05556	3.83
12	10	2008	0	1.02819	1.24594	4.61111	3.83
12	11	2008	0	1.20701	1.0194	5.33333	3.83
12	12	2008	0	1.60934	0.906138	5.11111	3.83
12	13	2008	0	1.83286	0.849504	6.38889	3.83
12	14	2008	1.016	1.83286	0.849504	4.38889	3.83
12	15	2008	9.398	3.21869	0.70792	7.77778	3.83
12	16	2008	15.24	1.65405	0.736237	6.16667	3.83
12	17	2008	0	2.2352	0.70792	5.5	3.83
12	18	2008	0	1.02819	0.70792	2.66667	3.83
12	19	2008	0	0.89408	0.70792	4.44444	3.83
12	20	2008	0	1.02819	0.70792	4.5	3.83
12	21	2008	0	0.715264	0.79287	4.88889	3.83
12	22	2008	4.318	2.63754	0.821187	8.5	3.83
12	23	2008	1.016	0.938784	0.877821	6.33333	3.83
12	24	2008	0	1.0729	0.906138	8.05556	3.83
12	25	2008	0	3.26339	0.849504	10.1111	3.83
12	26	2008	4.826	1.51994	0.736237	5.38889	3.83
12	27	2008	0	0.938784	0.736237	3.77778	3.83
12	28	2008	0	0.402336	0.79287	4.11111	3.83
12	29	2008	0	0.67056	0.79287	5.05556	3.83
12	30	2008	0	0.491744	0.821187	5.72222	3.83
12	31	2008	0	1.74346	0.821187	6.55556	3.83
1	1	2009	0	0.491744	0.821187	6.05556	0
1	2	2009	0	1.02819	0.79287	5.83333	0
1	3	2009	1.524	2.36931	0.764554	7.16667	0
1	4	2009	0	1.02819	0.79287	4.88889	0
1	5	2009	0	0.67056	0.821187	4.27778	0
1	6	2009	0	1.20701	0.821187	6.94444	0
1	7	2009	0	0.089408	0.934454	7.88889	0
1	8	2009	0	0.625856	1.55742	5.94444	0
1	9	2009	0	0.759968	2.26534	6.77778	0
1	10	2009	0	0.268224	2.32198	3.61111	0
1	11	2009	0	0.581152	2.37861	4.22222	0
1	12	2009	0	0.22352	2.74673	5.16667	0
1	13	2009	0	0.759968	3.05821	7.05556	0
1	14	2009	0	0.89408	3.7095	8.27778	0
1	15	2009	0	0.312928	4.30415	8.33333	0
1	16	2009	0	0.67056	4.30415	8.22222	0
1	17	2009	0	0.804672	4.33247	8.44444	0
1	18	2009	0	0.625856	4.36079	9.5	0
1	19	2009	0	0.536448	4.50237	8.94444	0
1	20	2009	0	0.67056	4.50237	9.61111	0
1	21	2009	0	0.715264	4.24752	11.2778	0
1	22	2009	0	1.25171	1.18931	12.4444	0
1	23	2009	3.81	0.759968	1.07604	13.1111	0
1	24	2009	0	1.56464	1.13267	13.7222	0
1	25	2009	1.524	3.17398	1.07604	11.1111	0
1	26	2009	1.778	0.89408	1.04772	7.77778	0
1	27	2009	0	1.69875	2.15208	5.33333	0
1	28	2009	0	0.625856	3.68118	5.38889	0
1	29	2009	0	0.491744	4.75722	6.05556	0
1	30	2009	0	0.581152	5.83326	6.77778	0
1	31	2009	0	0.804672	5.88989	7.55556	0
2	1	2009	0	0.938784	5.94653	7.94444	13.1467
2	2	2009	0	0.759968	6.45623	8.94444	13.1467
2	3	2009	0	0.715264	7.05088	10.2222	13.1467
2	4	2009	0	0.804672	7.36237	11.7778	13.1467
2	5	2009	0	2.01168	8.29682	13.7778	13.1467
2	6	2009	0	1.51994	8.97643	11.3889	13.1467
2	7	2009	5.08	1.69875	9.7693	8.72222	13.1467
2	8	2009	0.254	2.2799	10.3923	10.2778	13.1467
2	9	2009	4.064	2.63754	9.57108	8.77778	13.1467
2	10	2009	0	1.78816	8.83484	4.94444	13.1467
2	11	2009	0	1.60934	8.74989	6.44444	13.1467
2	12	2009	5.842	0.983488	9.17464	6.5	13.1467
2	13	2009	0	1.74346	9.68435	6.33333	13.1467
2	14	2009	7.874	2.01168	9.25959	5.72222	13.1467
2	15	2009	0	1.74346	8.69326	8.44444	13.1467
2	16	2009	0	2.32461	8.38177	10	13.1467
2	17	2009	4.826	3.79984	8.18356	9.11111	13.1467
2	18	2009	0	1.65405	8.15524	8.88889	13.1467
2	19	2009	0	0.44704	8.15524	8.94444	13.1467
2	20	2009	0	0.44704	8.01365	9.38889	13.1467
2	21	2009	0	0.759968	7.64554	9.38889	13.1467
2	22	2009	0	1.87757	7.16415	12.5556	13.1467
2	23	2009	2.794	1.92227	6.42791	14.3333	13.1467
2	24	2009	0	0.849376	6.03148	12.9444	13.1467
2	25	2009	0	1.74346	6.68276	12.9444	13.1467
2	26	2009	0	1.0729	6.99425	10.7222	13.1467
2	27	2009	0	1.29642	6.3996	10.8889	13.1467
2	28	2009	0	0.804672	5.55009	10.8889	13.1467
3	1	2009	0	1.47523	5.01207	15.2778	29.1767
3	2	2009	0	1.96698	4.72891	15.2778	29.1767
3	3	2009	0	2.68224	4.50237	14.1111	29.1767
3	4	2009	1.27	2.36931	4.07762	12.7222	29.1767
3	5	2009	0.254	1.43053	3.7095	8.55556	29.1767
3	6	2009	0	2.14579	3.68118	9.77778	29.1767
3	7	2009	0	1.65405	3.62455	8.38889	29.1767
3	8	2009	0	0.849376	3.62455	9.66667	29.1767
3	9	2009	0	2.81635	4.78554	10.0556	29.1767
3	10	2009	0.254	1.51994	5.88989	6.22222	29.1767
3	11	2009	0	1.25171	6.14475	8.5	29.1767
3	12	2009	0	0.983488	7.02257	9.38889	29.1767
3	13	2009	0	1.29642	7.73049	11.4444	29.1767
3	14	2009	0	1.20701	8.04197	12.1667	29.1767
3	15	2009	0	2.59283	8.41009	11.4444	29.1767
3	16	2009	0	0.938784	8.77821	11.8889	29.1767
3	17	2009	0	1.83286	9.23128	14.3889	29.1767
3	18	2009	0	1.38582	9.74098	14.6111	29.1767
3	19	2009	0	1.02819	9.74098	16	29.1767
3	20	2009	0	1.02819	9.17464	16.4444	29.1767
3	21	2009	0	1.47523	8.04197	16.1111	29.1767
3	22	2009	0	4.15747	6.76772	13.1111	29.1767
3	23	2009	0	2.32461	6.85267	7.33333	29.1767
3	24	2009	0	0.89408	7.05088	9.22222	29.1767
3	25	2009	0	1.1176	6.54118	12.2222	29.1767
3	26	2009	0	1.0729	6.11643	13.8889	29.1767
3	27	2009	0	2.63754	5.38019	15.7778	29.1767
3	28	2009	0	1.29642	4.50237	16.9444	29.1767
3	29	2009	0	3.26339	4.24752	17.0556	29.1767
3	30	2009	0	2.72694	4.33247	11.1111	29.1767
3	31	2009	0	1.1623	3.93604	12.6111	29.1767
4	1	2009	0	1.87757	3.48297	14.8889	49.0167
4	2	2009	0	1.69875	3.48297	16.5	49.0167
4	3	2009	0	4.73862	4.27584	13.9444	49.0167
4	4	2009	0	2.86106	5.32356	10.9444	49.0167
4	5	2009	0	0.536448	6.28633	13.3889	49.0167
4	6	2009	0	1.1623	7.7588	17.2778	49.0167
4	7	2009	0	2.95046	9.31623	18.0556	49.0167
4	8	2009	0	2.63754	10.7321	12.4444	49.0167
4	9	2009	0	1.1623	11.6382	12.2778	49.0167
4	10	2009	0	2.36931	11.2135	14.3889	49.0167
4	11	2009	0	2.01168	9.7693	11.8333	49.0167
4	12	2009	0	1.38582	8.41009	14.5556	49.0167
4	13	2009	0	1.56464	7.61722	16.2222	49.0167
4	14	2009	0	4.91744	6.68276	15.8333	49.0167
4	15	2009	0	3.93395	5.80494	9.77778	49.0167
4	16	2009	0	1.83286	5.38019	10.5556	49.0167
4	17	2009	0	1.29642	6.00316	14.0556	49.0167
4	18	2009	0	1.1176	6.54118	17.7778	49.0167
4	19	2009	0	1.38582	6.59781	20.6667	49.0167
4	20	2009	0	1.60934	7.0792	23	49.0167
4	21	2009	0	1.83286	8.12692	24.2222	49.0167
4	22	2009	0	1.65405	8.94811	24.8333	49.0167
4	23	2009	0	2.32461	9.57108	22.8889	49.0167
4	24	2009	0	3.08458	10.8453	19.0556	49.0167
4	25	2009	0	3.44221	12.1762	13.0556	49.0167
4	26	2009	0	1.38582	13.5921	14.2778	49.0167
4	27	2009	0	1.29642	14.6964	15.2778	49.0167
4	28	2009	0	3.26339	14.5265	13.7778	49.0167
4	29	2009	0	2.59283	14.4133	13.1667	49.0167
4	30	2009	0	2.2352	13.2523	14.6111	49.0167
5	1	2009	0	1.65405	12.2329	18.8333	49.9033
5	2	2009	0	1.78816	10.3923	17.8889	49.9033
5	3	2009	0	2.45872	8.18356	19	49.9033
5	4	2009	0	2.95046	6.17306	18.9444	49.9033
5	5	2009	0	2.10109	5.04039	21.2778	49.9033
5	6	2009	0	3.75514	4.61564	21.7778	49.9033
5	7	2009	0	3.26339	4.58732	22	49.9033
5	8	2009	0	2.05638	4.58732	20.1111	49.9033
5	9	2009	0	2.01168	4.61564	21.1667	49.9033
5	10	2009	0	2.2352	4.67227	21.9444	49.9033
5	11	2009	0	2.95046	4.70059	23.1667	49.9033
5	12	2009	0	3.97866	5.26692	21.3889	49.9033
5	13	2009	0	3.12928	6.82435	20.1111	49.9033
5	14	2009	0	3.12928	9.34454	21.9444	49.9033
5	15	2009	0	2.72694	13.2806	22.6111	49.9033
5	16	2009	0	1.60934	15.1212	25.2778	49.9033
5	17	2009	0	2.05638	16.9051	28.0556	49.9033
5	18	2009	0	2.68224	17.16	28.7222	49.9033
5	19	2009	0	1.92227	15.461	26.3333	49.9033
5	20	2009	0	2.14579	15.0362	24.2778	49.9033
5	21	2009	0	2.10109	14.8663	23.2222	49.9033
5	22	2009	0	1.87757	14.3566	23.3889	49.9033
5	23	2009	0	1.74346	13.9035	22.8889	49.9033
5	24	2009	0	2.50342	12.6576	21.8333	49.9033
5	25	2009	0	2.59283	11.6665	20.8333	49.9033
5	26	2009	0	1.69875	11.5533	22.8333	49.9033
5	27	2009	0	1.60934	12.1762	26.1667	49.9033
5	28	2009	0	1.92227	14.2434	27.5	49.9033
5	29	2009	0	2.01168	14.9796	29.2222	49.9033
5	30	2009	0	1.74346	14.3566	24.8333	49.9033
5	31	2009	0	1.92227	14.9513	24.0556	49.9033
6	1	2009	0	2.81635	15.999	24.3333	69.5067
6	2	2009	0	3.12928	16.4521	22.7222	69.5067
6	3	2009	0	2.32461	15.4327	21.2778	69.5067
6	4	2009	0	2.14579	14.4416	22.4444	69.5067
6	5	2009	4.064	2.36931	13.9885	19.7222	69.5067
6	6	2009	1.778	2.99517	13.677	18.9444	69.5067
6	7	2009	0	1.74346	13.8469	18.2778	69.5067
6	8	2009	0	2.59283	13.9319	26	69.5067
6	9	2009	0	2.50342	12.8275	21.1111	69.5067
6	10	2009	0	3.03987	12.1762	21	69.5067
6	11	2009	0	2.77165	12.4877	20.4444	69.5067
6	12	2009	0	2.50342	12.1196	21.1667	69.5067
6	13	2009	0	2.99517	11.0152	21.2778	69.5067
6	14	2009	0	2.90576	10.7604	20.7222	69.5067
6	15	2009	0	2.59283	11.978	20.7778	69.5067
6	16	2009	0	2.41402	14.0734	21.8333	69.5067
6	17	2009	0	2.2799	15.1778	23.7778	69.5067
6	18	2009	0	2.77165	15.7441	24.7222	69.5067
6	19	2009	0	2.05638	16.0273	27.6667	69.5067
6	20	2009	0	3.3528	14.7531	24.7778	69.5067
6	21	2009	0	2.81635	14.1584	21.3333	69.5067
6	22	2009	0	2.2352	14.4416	21.7222	69.5067
6	23	2009	0	1.60934	14.0451	23.7778	69.5067
6	24	2009	0	1.92227	15.0362	25.9444	69.5067
6	25	2009	0	2.36931	16.4804	26.5	69.5067
6	26	2009	0	1.92227	17.2166	25.6667	69.5067
6	27	2009	0	2.32461	17.9245	27.1111	69.5067
6	28	2009	0	1.87757	17.8679	29.2778	69.5067
6	29	2009	0	2.32461	17.4715	30.1667	69.5067
6	30	2009	0	1.87757	17.5281	29.1667	69.5067
7	1	2009	0	1.65405	17.1033	28	145.037
7	2	2009	0	2.32461	15.376	27.8333	145.037
7	3	2009	0	1.92227	14.7247	27.8889	145.037
7	4	2009	0	2.10109	14.1584	27.8889	145.037
7	5	2009	0	2.14579	15.0362	26.2222	145.037
7	6	2009	0	3.12928	15.3194	24.6667	145.037
7	7	2009	0	2.45872	13.677	23.5556	145.037
7	8	2009	0	2.77165	13.3655	24.6667	145.037
7	9	2009	0	2.90576	13.4222	24.7778	145.037
7	10	2009	0	2.59283	14.0168	24.2222	145.037
7	11	2009	0	2.10109	13.8469	25.8333	145.037
7	12	2009	0	2.45872	13.1107	25.7778	145.037
7	13	2009	0	2.68224	13.8752	25.1667	145.037
7	14	2009	0	2.14579	15.0645	26.6111	145.037
7	15	2009	0	1.87757	16.537	28.1667	145.037
7	16	2009	0	2.14579	17.6697	29.2778	145.037
7	17	2009	0	2.05638	18.3776	29.2222	145.037
7	18	2009	0	2.1905	18.5475	30.0556	145.037
7	19	2009	0	2.01168	18.7457	31	145.037
7	20	2009	0	2.2799	19.1422	30.8333	145.037
7	21	2009	0	2.63754	19.1138	28.3889	145.037
7	22	2009	0	2.59283	18.8307	27.1667	145.037
7	23	2009	0	2.14579	17.8396	28.2778	145.037
7	24	2009	0	2.14579	16.3954	26.8889	145.037
7	25	2009	0	2.54813	15.7725	25.5556	145.037
7	26	2009	0	1.69875	16.7069	27.0556	145.037
7	27	2009	0	1.56464	17.4998	28.7778	145.037
7	28	2009	0	1.69875	17.4998	29.2778	145.037
7	29	2009	0	2.2352	16.5653	27.9444	145.037
7	30	2009	0	2.32461	14.9796	27.3889	145.037
7	31	2009	0	2.41402	13.677	27.2222	145.037
8	1	2009	0	2.2352	11.5249	27.1111	130.807
8	2	2009	0	1.96698	10.4772	26.1111	130.807
8	3	2009	0	1.87757	10.5055	24.8889	130.807
8	4	2009	0	1.47523	10.6471	25	130.807
8	5	2009	0	2.2352	11.978	24.9444	130.807
8	6	2009	0	2.77165	12.516	22.8889	130.807
8	7	2009	0	3.03987	11.6382	21	130.807
8	8	2009	0	1.83286	10.5622	22.5556	130.807
8	9	2009	0	1.25171	10.3073	24.7778	130.807
8	10	2009	0	1.56464	10.6188	26.7778	130.807
8	11	2009	0	1.56464	10.4772	27.3333	130.807
8	12	2009	0	2.10109	11.2418	26.7778	130.807
8	13	2009	0	2.1905	12.9408	26.7778	130.807
8	14	2009	0	3.26339	13.3372	26.7778	130.807
8	15	2009	0	2.59283	12.8841	23.2222	130.807
8	16	2009	0	1.74346	13.9602	23.2222	130.807
8	17	2009	0	1.65405	15.7158	25	130.807
8	18	2009	0	1.47523	17.3582	26	130.807
8	19	2009	0	1.56464	18.321	26.7778	130.807
8	20	2009	0	1.87757	17.3299	26.5	130.807
8	21	2009	0	1.78816	15.8574	26.3889	130.807
8	22	2009	0	1.56464	15.2911	27.4444	130.807
8	23	2009	0	2.10109	14.5265	26.3889	130.807
8	24	2009	0	1.96698	13.6204	24.7778	130.807
8	25	2009	0	1.25171	11.9497	23.8889	130.807
8	26	2009	0	1.25171	10.0525	24	130.807
8	27	2009	0	1.02819	8.89148	24.2222	130.807
8	28	2009	0	1.29642	8.35346	25.6111	130.807
8	29	2009	0	1.25171	7.5889	25.7778	130.807
8	30	2009	0	1.29642	7.02257	27.0556	130.807
8	31	2009	0	1.83286	7.78712	29.1667	130.807
9	1	2009	0	1.78816	9.08969	25.7222	52.33
9	2	2009	0	1.29642	10.3923	27.6111	52.33
9	3	2009	0	1.43053	10.7887	29.1111	52.33
9	4	2009	0	1.65405	10.8737	26.1111	52.33
9	5	2009	0	2.45872	10.0241	24.5556	52.33
9	6	2009	0	2.86106	9.42949	22.6111	52.33
9	7	2009	0	2.2352	9.68435	21.2222	52.33
9	8	2009	0	1.1623	9.9392	22.0556	52.33
9	9	2009	0	0.983488	10.7038	23.6111	52.33
9	10	2009	0	1.60934	9.99583	24.5556	52.33
9	11	2009	0	1.20701	8.91979	25.5556	52.33
9	12	2009	0	1.20701	7.98534	27.2222	52.33
9	13	2009	0	1.34112	8.32514	24.1111	52.33
9	14	2009	0	3.12928	8.74989	20.7778	52.33
9	15	2009	0	1.51994	8.0986	19.8889	52.33
9	16	2009	0	1.1176	8.38177	22.5556	52.33
9	17	2009	0	1.47523	8.26851	23.5556	52.33
9	18	2009	0	1.1176	8.24019	25.4444	52.33
9	19	2009	0	1.51994	8.26851	27.3333	52.33
9	20	2009	0	1.78816	7.61722	25.1667	52.33
9	21	2009	0	1.1176	7.53227	24.9444	52.33
9	22	2009	0	1.25171	7.44732	25.9444	52.33
9	23	2009	0	0.89408	7.81544	26.2222	52.33
9	24	2009	0	1.47523	8.55167	25.5	52.33
9	25	2009	0	1.38582	8.15524	25.0556	52.33
9	26	2009	0	1.51994	7.53227	25.4444	52.33
9	27	2009	0	0.67056	8.07029	26.5	52.33
9	28	2009	0	1.51994	8.63662	25.7778	52.33
9	29	2009	0	2.63754	8.57999	21.5	52.33
9	30	2009	0	2.95046	8.52336	15.2778	52.33
10	1	2009	0	1.56464	8.01365	15.7222	27.8667
10	2	2009	0	1.34112	7.56059	17.3333	27.8667
10	3	2009	0	1.1623	7.33405	18.5	27.8667
10	4	2009	0	2.01168	7.16415	14.2222	27.8667
10	5	2009	0	1.56464	7.13583	12.6667	27.8667
10	6	2009	0	1.51994	7.10752	13.5	27.8667
10	7	2009	0	1.38582	7.0792	15.1667	27.8667
10	8	2009	0	0.983488	7.02257	16.1111	27.8667
10	9	2009	0	0.67056	6.96593	16.4444	27.8667
10	10	2009	0	0.849376	6.93762	17.6667	27.8667
10	11	2009	0	0.983488	6.96593	17	27.8667
10	12	2009	0	2.10109	7.02257	15.7222	27.8667
10	13	2009	0	2.63754	6.5695	15.7222	27.8667
10	14	2009	45.72	3.48691	5.86158	18	27.8667
10	15	2009	2.286	1.51994	5.66336	19.7778	27.8667
10	16	2009	0	1.47523	5.57841	19.3889	27.8667
10	17	2009	0	0.491744	5.55009	18.3333	27.8667
10	18	2009	0	0.849376	5.52178	20.3889	27.8667
10	19	2009	0	2.54813	5.52178	17.8889	27.8667
10	20	2009	0	1.78816	5.55009	13.0556	27.8667
10	21	2009	0	0.715264	5.63504	13.4444	27.8667
10	22	2009	0	0.849376	5.74831	15.4444	27.8667
10	23	2009	0	1.0729	5.71999	16.5556	27.8667
10	24	2009	0	0.938784	5.77663	17.8333	27.8667
10	25	2009	0	1.29642	5.86158	17.3889	27.8667
10	26	2009	0	1.1176	5.86158	17.7222	27.8667
10	27	2009	0	3.3081	5.74831	16.2778	27.8667
10	28	2009	0	2.05638	5.57841	10.0556	27.8667
10	29	2009	0	2.14579	5.46514	9.27778	27.8667
10	30	2009	0	0.67056	5.38019	10.8889	27.8667
10	31	2009	0	0.536448	5.38019	12.5556	27.8667
11	1	2009	0	1.02819	5.46514	13.7778	29.4867
11	2	2009	0	0.759968	5.55009	15.1111	29.4867
11	3	2009	0	0.78232	5.49346	18.4444	29.4867
11	4	2009	0	0.804672	5.46514	21.7778	29.4867
11	5	2009	0	0.938784	5.40851	14.8333	29.4867
11	6	2009	0	1.20701	5.35188	13.1111	29.4867
11	7	2009	0	1.87757	5.40851	13.7778	29.4867
11	8	2009	0	2.1905	5.21029	12.1111	29.4867
11	9	2009	0	0.67056	5.23861	10.7778	29.4867
11	10	2009	0	0.849376	5.57841	10.9444	29.4867
11	11	2009	0	0.715264	6.0598	12.2222	29.4867
11	12	2009	0	1.25171	6.3996	10.7778	29.4867
11	13	2009	1.524	1.51994	6.76772	10	29.4867
11	14	2009	0	1.29642	7.81544	7.66667	29.4867
11	15	2009	0	1.25171	8.21187	8.61111	29.4867
11	16	2009	0	0.804672	8.69326	8.94444	29.4867
11	17	2009	0	0.849376	8.63662	9.72222	29.4867
11	18	2009	0	1.25171	8.43841	9.44444	29.4867
11	19	2009	0	0.715264	8.46672	9	29.4867
11	20	2009	0	1.51994	8.35346	9.61111	29.4867
11	21	2009	1.524	3.44221	8.07029	12.0556	29.4867
11	22	2009	0	1.02819	7.61722	7.77778	29.4867
11	23	2009	0	1.29642	7.2491	10.7778	29.4867
11	24	2009	0	0.625856	6.93762	8.72222	29.4867
11	25	2009	0	0.89408	7.87207	9.22222	29.4867
11	26	2009	0	0.983488	20.0766	9.55556	29.4867
11	27	2009	0	1.47523	18.5192	10.3333	29.4867
11	28	2009	1.016	2.32461	8.0986	9.55556	29.4867
11	29	2009	0	1.25171	4.0493	6.44444	29.4867
11	30	2009	0	0.983488	2.32198	7.33333	29.4867
12	1	2009	0	0.983488	1.13267	7.55556	0.106667
12	2	2009	0	0.804672	0.453069	7.11111	0.106667
12	3	2009	0	0.491744	0.339802	7.05556	0.106667
12	4	2009	0	0.89408	0.235029	7.33333	0.106667
12	5	2009	0	0.849376	0.152911	8.27778	0.106667
12	6	2009	0	2.68224	0.104772	7.11111	0.106667
12	7	2009	0	3.03987	0.124594	8.27778	0.106667
12	8	2009	0	1.96698	0.0877821	1.88889	0.106667
12	9	2009	0	0.581152	0.0991088	1.77778	0.106667
12	10	2009	0	0.491744	0.0821187	4.77778	0.106667
12	11	2009	3.81	1.69875	0.079287	9.33333	0.106667
12	12	2009	3.302	2.2352	0.0651286	11.6667	0.106667
12	13	2009	8.89	3.79984	0.0538019	11.1111	0.106667
12	14	2009	0.508	1.69875	0.0424752	9.5	0.106667
12	15	2009	0	0.536448	0.0368118	7.44444	0.106667
12	16	2009	0	0.67056	0.0339802	8.27778	0.106667
12	17	2009	0	0.536448	0.0277505	7.72222	0.106667
12	18	2009	0	1.0729	0.0240693	9.27778	0.106667
12	19	2009	0	1.0729	0.0189723	9.27778	0.106667
12	20	2009	0	0.536448	0.0147247	7.11111	0.106667
12	21	2009	0	0.715264	0.00991088	9.22222	0.106667
12	22	2009	2.54	4.15747	0.00736237	9.77778	0.106667
12	23	2009	0	2.59283	0	4.66667	0.106667
12	24	2009	0	0.625856	0	3.77778	0.106667
12	25	2009	0	0.67056	0	4.55556	0.106667
12	26	2009	0	1.02819	0	5.38889	0.106667
12	27	2009	1.778	1.74346	0	9.16667	0.106667
12	28	2009	0.508	1.1176	0	7.88889	0.106667
12	29	2009	0	1.25171	0	8.44444	0.106667
12	30	2009	1.524	1.60934	0	8.55556	0.106667
12	31	2009	4.572	1.43053	0	8.94444	0.106667
1	1	2010	0	0.804672	0	7.66667	0
1	2	2010	0	1.25171	0	7.77778	0
1	3	2010	0	1.20701	0	8.11111	0
1	4	2010	0	0.849376	0	6.38889	0
1	5	2010	0	0.804672	0	6.22222	0
1	6	2010	0	0.938784	0.0118931	5.88889	0
1	7	2010	0	1.34112	0.62297	5.83333	0
1	8	2010	0	0.89408	0.70792	6.38889	0
1	9	2010	0	0.938784	0.849504	5.55556	0
1	10	2010	0	1.60934	0.991088	7.72222	0
1	11	2010	0	1.1623	1.38752	8.11111	0
1	12	2010	0	0.89408	1.84059	10.6111	0
1	13	2010	8.128	2.50342	1.64237	13.1667	0
1	14	2010	1.016	1.51994	1.67069	8.05556	0
1	15	2010	0	0.89408	2.26534	6.44444	0
1	16	2010	0	1.47523	2.49188	11.2222	0
1	17	2010	0	1.34112	2.54851	9.72222	0
1	18	2010	15.494	2.90576	2.23703	11.1667	0
1	19	2010	5.842	3.3975	1.72732	9.94444	0
1	20	2010	9.906	4.38099	1.75564	8.94444	0
1	21	2010	7.62	2.81635	1.35921	6.72222	0
1	22	2010	6.858	4.20218	0.934454	7.88889	0
1	23	2010	0	2.05638	0.736237	6.77778	0
1	24	2010	0	1.02819	0.70792	6.72222	0
1	25	2010	0	1.51994	0.679603	7.88889	0
1	26	2010	0	1.56464	0.679603	9	0
1	27	2010	0.254	1.38582	0.70792	9.94444	0
1	28	2010	0	0.759968	0.79287	9.88889	0
1	29	2010	0	1.25171	0.962771	9.66667	0
1	30	2010	0	1.38582	1.33089	10.7778	0
1	31	2010	0	1.25171	2.23703	7.94444	0
2	1	2010	0	0.715264	2.77505	8.38889	2.68333
2	2	2010	0	0.938784	3.0299	9.72222	2.68333
2	3	2010	0	0.89408	3.34138	9.16667	2.68333
2	4	2010	0	1.43053	3.48297	9.22222	2.68333
2	5	2010	2.794	2.2352	3.42633	12.3333	2.68333
2	6	2010	2.032	1.69875	3.34138	11.2222	2.68333
2	7	2010	3.556	0.804672	4.19089	9.27778	2.68333
2	8	2010	0.254	0.983488	5.88989	10.0556	2.68333
2	9	2010	0	1.92227	7.5889	9.72222	2.68333
2	10	2010	2.54	1.69875	8.12692	7.22222	2.68333
2	11	2010	0	0.89408	8.91979	8.33333	2.68333
2	12	2010	0	0.759968	9.23128	8.83333	2.68333
2	13	2010	0	0.581152	9.48613	9.94444	2.68333
2	14	2010	0	0.983488	9.57108	9.72222	2.68333
2	15	2010	0	0.715264	9.9392	12.2778	2.68333
2	16	2010	0	0.67056	11.2418	11.7778	2.68333
2	17	2010	0	0.89408	13.3089	12.2222	2.68333
2	18	2010	0	0.67056	12.9974	13.1111	2.68333
2	19	2010	0	1.0729	12.0346	12.8889	2.68333
2	20	2010	0	1.65405	11.4966	11.7222	2.68333
2	21	2010	4.572	1.25171	10.2224	11.1667	2.68333
2	22	2010	1.778	2.32461	9.48613	9.61111	2.68333
2	23	2010	0	1.1623	9.06138	7.88889	2.68333
2	24	2010	3.556	2.41402	8.72157	10.8889	2.68333
2	25	2010	10.668	1.43053	7.44732	10.3333	2.68333
2	26	2010	0	1.34112	6.68276	10.3889	2.68333
2	27	2010	14.224	2.90576	5.86158	12.7222	2.68333
2	28	2010	9.652	1.56464	5.46514	11.5556	2.68333
3	1	2010	0	0.536448	6.99425	11.4444	52.1667
3	2	2010	0	1.69875	9.40118	12.8889	52.1667
3	3	2010	1.778	2.59283	10.7321	11.2222	52.1667
3	4	2010	2.794	2.05638	11.1568	8.94444	52.1667
3	5	2010	0	0.983488	13.4788	7.83333	52.1667
3	6	2010	0	1.25171	14.6681	10.2778	52.1667
3	7	2010	0	2.01168	15.6875	10.2222	52.1667
3	8	2010	0	2.2799	16.3388	11.9444	52.1667
3	9	2010	1.778	2.63754	15.376	7.5	52.1667
3	10	2010	0	2.2352	14.9513	7.61111	52.1667
3	11	2010	0.254	1.43053	14.8946	7.27778	52.1667
3	12	2010	0	1.51994	14.9513	9.88889	52.1667
3	13	2010	2.032	3.79984	14.6681	11.5556	52.1667
3	14	2010	0	1.78816	15.0362	8.61111	52.1667
3	15	2010	0	0.804672	15.8008	10.8889	52.1667
3	16	2010	0	0.89408	16.5936	14.5556	52.1667
3	17	2010	0	1.0729	17.075	14.7222	52.1667
3	18	2010	0	1.20701	17.1033	15.3333	52.1667
3	19	2010	0	1.78816	17.1883	15.3333	52.1667
3	20	2010	0	1.0729	17.9245	15.9444	52.1667
3	21	2010	0	1.0729	18.4342	14.8889	52.1667
3	22	2010	0	1.0729	19.0289	13.5556	52.1667
3	23	2010	0	2.2352	19.935	13.7778	52.1667
3	24	2010	0	1.1176	19.9917	14.6111	52.1667
3	25	2010	0	2.68224	20.5863	14.3333	52.1667
3	26	2010	0	3.3975	21.2093	12.4444	52.1667
3	27	2010	0	1.43053	21.9172	12.4444	52.1667
3	28	2010	0	1.1176	22.2853	14.9444	52.1667
3	29	2010	0	1.29642	21.8889	15.2222	52.1667
3	30	2010	0	2.2799	21.6907	15	52.1667
3	31	2010	0.254	3.48691	21.9172	11.8889	52.1667
4	1	2010	0	1.56464	22.9932	8.88889	40.3933
4	2	2010	0	1.87757	24.6639	10.5	40.3933
4	3	2010	0	2.14579	26.2214	12.5556	40.3933
4	4	2010	0	2.14579	27.0709	8.77778	40.3933
4	5	2010	3.048	3.26339	27.6372	10.8889	40.3933
4	6	2010	2.794	1.47523	27.8637	9.66667	40.3933
4	7	2010	0	1.60934	27.9487	12.1667	40.3933
4	8	2010	0	1.38582	28.3168	15.1667	40.3933
4	9	2010	0	2.1905	28.8831	15.5	40.3933
4	10	2010	0	2.01168	28.8831	15.5556	40.3933
4	11	2010	0	2.50342	29.1663	13.2222	40.3933
4	12	2010	5.588	3.48691	28.6	10.4444	40.3933
4	13	2010	17.78	1.65405	28.3168	10.5	40.3933
4	14	2010	0	1.0729	28.2318	12.8889	40.3933
4	15	2010	0	1.87757	28.0053	13.1667	40.3933
4	16	2010	4.6736	2.58389	27.8637	11.7444	40.3933
4	17	2010	3.556	2.40508	27.6089	11.5	40.3933
4	18	2010	0.508	2.42296	27.7221	11.2111	40.3933
4	19	2010	0.508	2.44978	27.8637	10.8222	40.3933
4	20	2010	0	4.82803	27.9204	11.7222	40.3933
4	21	2010	0	2.59283	27.9204	9.22222	40.3933
4	22	2010	2.54	1.74346	25.9948	9.05556	40.3933
4	23	2010	0	1.20701	22.0871	10.9444	40.3933
4	24	2010	0	0.849376	16.7352	15.3889	40.3933
4	25	2010	0	1.43053	14.0734	17.5556	40.3933
4	26	2010	0	1.1176	15.7725	19.6111	40.3933
4	27	2010	0	1.92227	17.7546	18.8889	40.3933
4	28	2010	0	3.97866	16.4237	15.7778	40.3933
4	29	2010	0.762	4.11277	20.3598	11.1667	40.3933
4	30	2010	0	2.72694	27.0709	12.1111	40.3933
5	1	2010	0	1.47523	27.5806	13.8889	58.74
5	2	2010	0	2.05638	26.5612	17.2222	58.74
5	3	2010	0	1.69875	27.3257	19.7222	58.74
5	4	2010	0	2.41402	28.6	21.1111	58.74
5	5	2010	0	3.53162	29.7326	18.6667	58.74
5	6	2010	0	3.08458	29.4495	15.7778	58.74
5	7	2010	0	2.05638	29.4495	18.7778	58.74
5	8	2010	0	2.81635	30.0158	18.6667	58.74
5	9	2010	0	3.71043	29.1663	17	58.74
5	10	2010	0.762	1.83286	26.3913	12.8889	58.74
5	11	2010	0.762	3.53162	22.3703	11.7222	58.74
5	12	2010	0	1.92227	19.935	15.6111	58.74
5	13	2010	0	1.51994	21.0111	18.5556	58.74
5	14	2010	0	2.10109	21.634	20.8333	58.74
5	15	2010	0	2.2352	21.4075	21.6111	58.74
5	16	2010	0	2.14579	21.0111	23.0556	58.74
5	17	2010	0	2.05638	20.1616	19.3889	58.74
5	18	2010	2.032	1.1623	18.1511	16.1111	58.74
5	19	2010	0	2.14579	17.9245	17.7222	58.74
5	20	2010	0	3.88925	18.8024	19.3333	58.74
5	21	2010	0	3.57632	19.1705	16.7222	58.74
5	22	2010	0	3.59867	19.0006	14.6389	58.74
5	23	2010	0	3.62102	18.2927	12.5556	58.74
5	24	2010	0	2.36931	19.935	14.6111	58.74
5	25	2010	0	2.45872	25.4568	16.4444	58.74
5	26	2010	0.508	1.78816	30.299	17.2778	58.74
5	27	2010	0	2.2799	30.0158	17.5	58.74
5	28	2010	0	4.11277	29.7326	16.0556	58.74
5	29	2010	0	2.59283	29.7326	16.7778	58.74
5	30	2010	0	2.10109	30.299	20.4444	58.74
5	31	2010	0	2.2352	30.0158	22.8333	58.74
6	1	2010	0	3.17398	28.3168	22.8333	67.7833
6	2	2010	0	3.3528	25.3719	21.8333	67.7833
6	3	2010	0	2.59283	23.2198	24.3333	67.7833
6	4	2010	0	3.53162	23.1915	25.3889	67.7833
6	5	2010	0	2.95046	23.2481	26.0556	67.7833
6	6	2010	0	2.90576	24.8338	27.0556	67.7833
6	7	2010	0	3.44221	27.439	27.5	67.7833
6	8	2010	0	2.59283	29.4495	24.8889	67.7833
6	9	2010	0	3.75514	31.1485	23.4444	67.7833
6	10	2010	0	4.78333	31.7148	20.5	67.7833
6	11	2010	0	2.99517	31.7148	19.1667	67.7833
6	12	2010	0	2.01168	27.6372	22.3889	67.7833
6	13	2010	0	1.92227	22.9649	24.8333	67.7833
6	14	2010	0	2.2352	21.4075	26.7778	67.7833
6	15	2010	0	1.96698	20.6429	26.6111	67.7833
6	16	2010	0	3.17398	20.02	22.6667	67.7833
6	17	2010	0	2.59283	19.3687	21.6667	67.7833
6	18	2010	0	1.69875	18.6325	23.1111	67.7833
6	19	2010	0	2.54813	17.3299	20.5556	67.7833
6	20	2010	0	3.03987	17.2732	20.0556	67.7833
6	21	2010	0	2.90576	18.0661	26.8889	67.7833
6	22	2010	0	1.74346	17.8396	23.8889	67.7833
[truncated: 1,653 more rows]
